1 **Adaptive introgression from distant Caribbean islands**  
2 **contributed to the diversification of a microendemic**  
3 **radiation of trophic specialist pupfishes**  
4  
5  
6  
7

8 Emilie J. Richards<sup>1</sup> and Christopher H. Martin<sup>1\*</sup>  
9  
10  
11  
12  
13

14 <sup>1</sup> Biology Department, University of North Carolina at Chapel Hill, Chapel Hill, North Carolina,  
15 United States of America  
16  
17  
18  
19  
20  
21  
22  
23  
24

25 Short title: Caribbean-wide sources of adaptive variation contribute to localized adaptive  
26 radiation  
27

28 \*Correspondence: Christopher H Martin. Department of Biology, University of North Carolina at  
29 Chapel Hill, Campus Box 3280, 120 South Rd., NC, 27599, USA

30 Email: [chmartin@unc.edu](mailto:chmartin@unc.edu)

31 Data accessibility: All datasets used for this study will be deposited in Dryad and the NCBI Short  
32 Read Archive.

33 Key words: adaptive introgression, speciation, adaptive radiation, hybridization

34 Word count abstract: 282 words; Word count main text: 6,458; Figures 1-7; Table 1; Supplemental  
35 Figures S1 – S9; Tables S1 – S4  
36

## 37 **Abstract**

38 Rapid diversification often involves complex histories of gene flow that leave variable and  
39 conflicting signatures of evolutionary relatedness across the genome. Identifying the extent and  
40 source of variation in these evolutionary relationships can provide insight into the evolutionary  
41 mechanisms involved in rapid radiations. Here we compare the discordant evolutionary  
42 relationships associated with species phenotypes across 42 whole genomes from a sympatric  
43 adaptive radiation of *Cyprinodon* pupfishes endemic to San Salvador Island, Bahamas and several  
44 outgroup pupfish species in order to understand the rarity of these trophic specialists within the  
45 larger radiation of *Cyprinodon*. 82% of the genome depicts close evolutionary relationships among  
46 the San Salvador Island species reflecting their geographic proximity, but the vast majority of the  
47 fixed variants between the specialist species lie in regions with discordant topologies. These  
48 regions include signatures of selective sweeps and adaptive introgression from neighboring islands  
49 into each of the specialist species. Hard selective sweeps of genetic variation on San Salvador  
50 contributed 10-fold more to divergence between specialist species within the radiation than  
51 adaptive introgression of Caribbean genetic variation; however, some of these introgressed regions  
52 from distant islands were associated with the primary axis of oral jaw divergence within the  
53 radiation. For example, standing variation in a proto-oncogene (*ski*) known to have effects on jaw  
54 size introgressed into one San Salvador specialist from an island 300 km away. The complex  
55 emerging picture of the origins of adaptive radiation on San Salvador indicates that multiple  
56 sources of genetic variation contributed to the adaptive phenotypes of novel trophic specialists on  
57 the island. Our findings suggest that a suite of factors, including rare adaptive introgression, may  
58 also be required to trigger adaptive radiation in the presence of ecological opportunity.

59

## 60 **Author summary**

61 Groups of closely related species can rapidly evolve to occupy diverse ecological roles, but the  
62 ecological and genetic conditions that trigger this diversification are still highly debated. We  
63 examine patterns of molecular evolution across the genomes of a rapid radiation of pupfishes that  
64 includes two trophic specialists. Despite apparently widespread ecological opportunities and gene  
65 flow across the Caribbean, this radiation is endemic to a single Bahamian Island. Using the whole  
66 genomes of 42 pupfish we find evidence of extensive and previously unexpected variation in  
67 evolutionary relatedness among Caribbean pupfish. Two sources of genetic variation have  
68 contributed to the adaptive diversification of complex phenotypes in this system: selective sweeps  
69 of genetic variation from across the Caribbean that was brought into San Salvador through  
70 hybridization and genetic variation found on San Salvador. While genetic variation from San  
71 Salvador appears to be relatively more common in the divergence observed among specialists,  
72 hybridization probably played an important role in the evolution of the complex phenotypes as  
73 well. Our findings that multiple sources of genetic variation contribute to the San Salvador  
74 radiation suggest that a complex suite of factors, including hybridization with other species, may  
75 be required to trigger adaptive radiation in the presence of ecological opportunity.

76

77

78

79

80

81

## 82 **Introduction**

83 Adaptive radiations are central to our understanding of evolution because they generate a wealth  
84 of ecological, phenotypic, and species diversity, often in very rapid bursts. However, the  
85 mechanisms that trigger the rapid bursts of trait divergence, niche evolution, and diversification  
86 characteristic of classic adaptive radiations are still debated. The availability of resources in new  
87 environments with few competitors has long been seen as the major force driving adaptive  
88 radiations[1–3], but it is a longstanding question why only some lineages rapidly diversify in  
89 response to such resource abundance while others do not [4–9].

90       Gene flow can introduce adaptive genetic variants [10,11], genetic incompatibilities [12–  
91 14], and/or reinforcements [15–18] that initiate or contribute to the process of speciation and a  
92 growing number of studies have identified gene flow and genome-wide introgression across a  
93 range of adaptive radiations [19–26]. The hybrid swarm hypothesis [27] proposes that  
94 hybridization among distinct lineages can introduce genetic diversity and novel allele  
95 combinations genome-wide that may trigger rapid diversification in the presences of abundant  
96 ecological opportunity. Yet there is still little evidence that hybridization specifically triggered  
97 adaptive diversification within radiations, as opposed to simply being pervasive throughout the  
98 history of any young rapidly diversifying group [25,28]. One of the only examples with strong  
99 evidence of hybridization leading to ecological and species diversification is that of several hybrid  
100 species within a radiation of *Helianthus* sunflowers [29–34]. However, this may simply represent  
101 examples of multiple homoploid speciation events within an already radiating lineage rather than  
102 a hybrid swarm scenario. So while there is convincing evidence that hybridization can facilitate  
103 diversification among species pairs (but see [26,35] for a potential multispecies outcome of

104 hybridization), it is still unclear whether gene flow is a major factor constraining adaptive radiation  
105 in some lineages or if ecological opportunity is the sole constraint.

106         The adaptive radiation of San Salvador pupfishes provides an outstanding system to  
107 address these questions about the contributions of different sources of genetic variation to rapid  
108 diversification and the role of gene flow in the evolution of complex phenotypes. Pupfish species  
109 of the genus *Cyprinodon* inhabit saline lakes and coastal areas across the Caribbean and Atlantic  
110 and nearly all pupfishes are dietary generalists consuming algae and small invertebrates [36]. In  
111 contrast, three *Cyprinodon* species live sympatrically in the hypersaline lakes of San Salvador  
112 Island and comprise a small radiation that has occurred within the past 10,000 years based on the  
113 most recent glacial maximum when these lakes were dry due to lowered sea levels [37–39]. This  
114 radiation is composed of the widespread generalist algae-eating species *Cyprinodon variegatus*  
115 and two endemic specialists that coexist with the generalist in all habitats in some lakes. These  
116 specialists have adapted to unique trophic niches using novel morphologies: the molluscivore  
117 *Cyprinodon brontotheroides* with a unique nasal protrusion and the scale-eating *Cyprinodon*  
118 *desquamator* with enlarged oral jaws and adductor mandibulae muscles [36,40]. Surveys of  
119 populations living on neighboring islands in the Bahamas and phylogenetic analyses with other  
120 *Cyprinodon* species indicate that these specialist species are endemic to the hypersaline lakes of  
121 San Salvador Island and that both specialists arose from a generalist common ancestor during this  
122 recent radiation [41].

123         The currently available ecological and genetic data on the group provides little indication  
124 as to why this radiation is localized to a single island. Variation in ecological opportunity among  
125 hypersaline lake environments in the Caribbean does not appear to explain the rarity of this  
126 radiation [41]. This finding suggests a potentially important role for sufficient genetic variation to

127 respond to abundant, underutilized resources in these environments. However, a hybrid swarm  
128 hypothesis about the origins of the radiation does not appear to explain its rarity either: genetic  
129 diversity is comparable among islands and gene flow occurs among all Caribbean islands  
130 investigated, not only into San Salvador Island [41]. Novel traits and increased rates of  
131 diversification associated with them are well documented in this system [36,41,42], but  
132 understanding the rarity of this adaptive radiation requires a thorough investigation of the  
133 underlying genetic variation that accompanies these rare ecological transitions. A recent study  
134 investigating the genetic basis of trophic specialists in this radiation revealed very few regions  
135 underlying these phenotypes [43]. Only hundreds of variants out of 12 million were fixed within  
136 the scale-eater and molluscivore species. Since genetic divergence is limited to particular regions,  
137 localized rather than genome-wide investigations of the genome will be important for  
138 understanding how genetic variation, possibly originating outside of San Salvador, has contributed  
139 to the exceptional phenotypic diversification restricted to this island. Here, we use a machine-  
140 learning approach to identify regions of the genome with different evolutionary histories across 42  
141 pupfish genomes sampled from the San Salvador radiation, two distant Caribbean islands, and 3  
142 additional outgroups. We then scan the genome for evidence of localized introgression with  
143 pupfish populations outside of San Salvador Island and compare the relative contributions of  
144 adaptive introgression from two distant islands and hard selective sweeps to the divergence of each  
145 specialist species.

146

## 147 **Results**

### 148 **Extensive variation in patterns of evolutionary relatedness across the genome**

149 To identify localized patterns of population history across the genome, we used the machine-  
150 learning approach SAGUARO. SAGUARO combines a Hidden Markov Model with a self-  
151 organizing map to characterize local histories across the genome among aligned individuals [44].  
152 This method does not require any *a priori* hypotheses about the relationships among individuals,  
153 but rather infers them directly from the genome by finding regions of consecutive nucleotides with  
154 a similar pattern of genetic differentiation, building hypotheses about relationships among  
155 individuals from these genetic differences, and then assigning regions of the genome to these  
156 hypothesized local “histories”. Since smaller segments with fewer informative SNPs are more  
157 likely to be incorrectly assigned to a hypothesized history by chance (pers. comm. M.G. Grabherr),  
158 we filtered out segments with fewer than 20 SNPs. Using this approach, we partitioned the genome  
159 into a total of 15 unique histories across 227,248 genomic segments that ranged from 101-324,088  
160 base pairs in length (median: 852 bp) (S1 and S2 Figs; Table S1).

161 The most prevalent history across 64% of the genome featured the expected species  
162 phylogeny for this group from previous genome-wide studies [36,41,45], in which all individuals  
163 from San Salvador Island were cleanly grouped into a single clade with distant relationships to  
164 generalist pupfish populations from other islands in the Caribbean, Death Valley in California, and  
165 two specialists from a second radiation in Mexico spanning the most divergent branch of the  
166 *Cyprinodon* tree (Fig 1). Unlike previous genome-wide phylogenies [41,45], and with the  
167 exception of a few individuals that grouped with molluscivores by lake, the generalists on San  
168 Salvador form a discrete clade from the molluscivores and scale-eaters.

169 Within this dominant topology, scale-eaters from six lakes on San Salvador fell into one of  
170 two separate clades: small-jawed individuals from Osprey Lake, Great Lake, and Oyster Pond and  
171 larger-jawed individuals from Crescent Pond, Stout Lake, Osprey Lake, and Little Lake (Fig 1).

172 Molluscivores did not form a single clade as individuals from some lakes (Crescent Pond and  
173 Moon Rock) were more closely related to generalists from the same lake than molluscivores from  
174 other lakes, similar to previous genome-wide phylogenies [45]. Another history covering 10% of  
175 genome was very similar to the dominant one, differing only in the relationships among San  
176 Salvador generalists (S1 Fig). Additional histories spanning 7.6% of the genome featured a single  
177 San Salvador clade but also depicted a closer relationship between San Salvador and the outgroups  
178 as well as groupings of all three San Salvador species by lake in Crescent Pond and Moon Rock  
179 Pond. When combined with the dominant history, only 82.6% of the genome supported the  
180 expected San Salvador clade (S1 Table).

181 In other regions of the genome, San Salvador did not form a single clade (Figs 2A-C and  
182 S2, S1 Table). The most frequently observed alternative relationships depicted specialist  
183 individuals as a clade outside of the San Salvador Island group and sister to all the outgroup  
184 *Cyprinodon* species (Figs 2A,B). One such history, the ‘large-jawed scale-eater topology’, featured  
185 large-jawed scale-eater individuals outside of the San Salvador clade and was assigned to 4,437  
186 segments covering 3.27% of the genome (Fig 2A). Another history, the ‘molluscivore topology’  
187 showed a similar pattern in which the molluscivore individuals form a single clade outside of the  
188 San Salvador group and sister to all other outgroups (Fig 2B). This molluscivore topology was  
189 assigned to 3,916 segments and covered 3.11% of the genome. Another 2,029 segments covering  
190 1.66% of the genome were assigned to a topology where both the large-jawed and small-jawed  
191 scale-eaters formed a combined clade outside of the San Salvador group, the “combined scale-  
192 eater topology’ (Fig 2C). Other histories featuring one of the specialists separated from the rest of  
193 San Salvador covered 0.76%-2.48% of the genome (Table S1).



194 Unexpectedly, all histories separated scale-eaters into groups of smaller- and larger-jawed  
195 individuals and the relationships between these two groups and other species differed across  
196 different regions of the genome. In some regions, the small-jawed scale-eater individuals were  
197 sister to the large-jawed scale-eaters (Figs 1,2B-C, and S1). In other regions, the small-jawed scale-  
198 eaters were more closely related to the generalists and molluscivores (Figs 2A and S1). These  
199 small-jawed scale-eaters may be a product of ongoing hybridization between species on San  
200 Salvador, an intermediate stage in the evolutionary path towards scale-eating, or a new species.  
201 Their consistent appearance as a separate clade supports a previously unrecognized small-jawed  
202 scale-eating species in some lakes.

203

#### 204 **Localized introgression into both specialists from across the Caribbean**

205 We examined signals of introgression from two distant pupfish generalist populations in the  
206 Caribbean: Lake Cunningham, New Providence Island in the Bahamas (described as the endemic  
207 species *Cyprinodon laciniatus* [46]) and Etang Saumautre Lake in the Dominican Republic  
208 (described as the endemic species *Cyprinodon bondi* [47]). We characterized the genomic  
209 landscape of introgression in the three San Salvador species using  $f_4$  statistics that were initially  
210 developed to test for introgression among human populations [48–50].

211 We found 230 10-kb regions out of 100,260 that contained significant evidence of  
212 introgression between *C. laciniatus* or *C. bondi* and the San Salvador specialists (Fig 3A).  
213 Introgressed regions were scattered across the genome in 140 of the 9,259 scaffolds in our dataset.  
214 These regions were not typically concentrated in one section of the genome, with the largest cluster  
215 within a single scaffold containing only 5% of the total regions detected (Fig 3A). The genomic  
216 regions with significant evidence of introgression varied between the two specialists (Fig 3B,C),

217 suggesting that admixture with other Caribbean populations has occurred multiple times and  
218 independently for each specialist or that different introgressed regions were used by the two  
219 specialists after a single admixture event (see S3-S5 Figs for full Manhattan plots). Only 23 regions  
220 of the 205 and 236 regions with significant evidence of introgression were shared between  
221 generalist/scale-eater and generalist/molluscivore comparisons, respectively. We also tested for  
222 introgression with the small-jawed scale-eaters excluded to search for potential introgression with  
223 the large-jawed scale-eaters alone (S6 Fig). Introgressed regions were less variable between the  
224 two groups of scale-eaters, with 150 of 211 regions shared. The sixty-one introgressed regions  
225 unique to the large-jawed scale-eaters suggest that some introgression occurred between  
226 populations on other Caribbean islands and the large-jawed scale-eater population, independently  
227 from the small-jawed scale-eaters.

228 To assess whether our regions of introgression were predominately from regions of low  
229 diversity, we looked at  $D_{xy}$  and  $\pi$  estimates across the detected regions of introgression in  
230 comparison to the genome-wide estimates (mean  $D_{xy}=0.116$ ; mean  $\pi$  scale-eater= $0.0035$ ; mean  $\pi$   
231 molluscivore= $0.0044$ ). We found that while some of the regions with significant  $f_4$  values were in  
232 regions with low  $D_{xy}$  and/or  $\pi$  between the San Salvador species, the majority were in regions of  
233 intermediate diversity (S7 Fig), and some were in regions with higher between-population  
234 divergence between the two specialists (S7 Fig), consistent with introgression that contributed to  
235 speciation.

236

237 **Multiple sources of genetic variation underlie species divergence**

238 The relationships observed in the three alternative topologies (Fig 2) underlie most of the  
239 divergence observed between the molluscivores and scale-eaters, as 75% and 88% of the fixed  
240 SNPs between molluscivores and large-jawed scale-eaters and molluscivores and all scale-eaters  
241 respectively fall in these histories that make up less than 5% of the genome in total. Many of these  
242 regions contained candidate genes previously associated with variation in *Cyprinodon* jaw size  
243 [43]: 18 of the 31 candidate regions occurred in the combined scale-eater topology, and 1 candidate  
244 region in the molluscivore topology.

245 We then assessed the relative contributions of different sources of genetic variation to the  
246 divergence observed between the two specialists. The overlaps between these signals are  
247 summarized in Fig 4 (also see S8 Fig). The alternative topologies contained a greater proportion  
248 of regions with introgressed genetic variation and selective sweeps than those regions assigned to  
249 the dominant topology (Figs 4 and S8).

250

### 251 **Adaptive introgression contributed to localized adaptive radiation: a case study of *ski***

252 In general, selective sweeps of introgressed genetic variation that contributed to species divergence  
253 between the specialists were rare. However, four of the 31 regions strongly associated with jaw  
254 size variation in the specialists [43] showed strong evidence of introgression from *Cyprinodon*  
255 species on two distant Caribbean islands (Table 1). This includes the proto-oncogene *ski*, a  
256 candidate gene with known craniofacial effects. *Ski* encodes a nuclear protein that binds to DNA  
257 and modulates transcription [51,52]. Mutations in *ski* cause marked reductions in skeletal muscle  
258 mass, depressed nasal bridges, and shortened, thick mandible bones in mice [53,54], remarkably  
259 similar to the novel craniofacial morphologies in San Salvador Island pupfishes, including  
260 increased nasal/maxillary protrusion, shortened lower jaw, and thicker dentary and articular bones

261 [40].

262 **Table 1. Adaptively introgressed 10 kb regions and gene annotations for fixed SNPs between**  
 263 **scale-eater and molluscivore species that lie in segments assigned to the three alternative**  
 264 **topologies.** Asterisks (\*) indicate SNPs in gene regions that have been associated with San  
 265 Salvador pupfish jaw size variation in a previous study [43]. Bolded genes have known functional  
 266 effects on craniofacial traits in a model system. Regions that are not annotated for genes are  
 267 indicated with a dash (-).

268

| Scaffold                         | Position      | Segment Length | $f_4$ | Fixed SNPs | Tajima's D Molluscivore | Tajima's D Scale-eater | Gene        |
|----------------------------------|---------------|----------------|-------|------------|-------------------------|------------------------|-------------|
| Large-jawed scale-eater topology |               |                |       |            |                         |                        |             |
| KL652578.1                       | 34250-35784   | 1534           | 0.34  | 7          | 0.05                    | -2.16                  | -           |
| KL652808.1                       | 48674-50395   | 1721           | -0.30 | 50         | -2.09                   | -2.10                  | ube2        |
| KL653236.1                       | 261439-262126 | 687            | 0.27  | 11         | -2.29                   | -2.11                  | -           |
| KL653461.1                       | 31579-32075   | 496            | -0.30 | 6          | -2.02                   | -2.10                  | -           |
| Combined scale-eater topology    |               |                |       |            |                         |                        |             |
| KL652649.1                       | 863752-863969 | 217            | 0.25  | 20         | -2.49                   | -1.89                  | -*          |
| KL652674.1                       | 781305-782379 | 1074           | 0.23  | 21         | -1.99                   | -2.22                  | -           |
| KL652715.1                       | 801693-804224 | 2531           | -0.22 | 72         | -2.19                   | -1.81                  | pard3*      |
| KL652715.1                       | 814671-815203 | 532            | -0.22 | 3          | -1.46                   | -1.81                  | pard3*      |
| KL652761.1                       | 939073-939598 | 525            | 0.29  | 7          | -1.98                   | -1.81                  | colgalt2    |
| KL652959.1                       | 292277-293459 | 1182           | -0.25 | 5          | -1.12                   | -1.81                  | wnt7b       |
| KL652959.1                       | 294961-295670 | 709            | -0.25 | 5          | -1.12                   | -1.81                  | wnt7b       |
| KL652983.1                       | 268808-270404 | 1596           | 0.26  | 2          | -2.24                   | -1.82                  | <b>ski*</b> |
| KL653171.1                       | 369020-369346 | 326            | -0.25 | 2          | -2.03                   | -1.89                  | lbt2        |
| KL653171.1                       | 370174-370702 | 528            | -0.25 | 2          | -1.11                   | -1.89                  | lbt2        |
| KL653356.1                       | 50459-51629   | 1170           | 0.26  | 9          | -2.12                   | -1.82                  | srbd1       |
| KL653356.1                       | 57713-59092   | 1379           | 0.26  | 9          | -2.12                   | -1.82                  | srbd1       |
| KL653356.1                       | 75673-76452   | 779            | -0.27 | 20         | -2.21                   | -1.81                  | srbd1       |
| KL653706.1                       | 184149-184721 | 572            | 0.36  | 31         | -2.25                   | -1.89                  | plekhg*     |
| Molluscivore topology            |               |                |       |            |                         |                        |             |
| KL652867.1                       | 572016-572646 | 630            | -0.32 | 2          | -0.86                   | -1.89                  | nbea        |

269

270 The adaptively introgressed segment is located at the start of *ski* in the 5' untranslated  
271 region and contains a fixed SNP, signature of positive selection, reduced diversity in both of the  
272 specialists, and high absolute genetic divergence between the two specialists in this region  
273 compared to surrounding regions on the scaffold (Fig 5). This pattern is consistent with a hard  
274 selective sweep of an introgressed *ski* allele from outside San Salvador. To further assess the source  
275 of introgression and which specialist is the recipient, we compared  $F_{st}$  in this region between the  
276 outgroups individuals and specialists. Genetic differentiation was minimal between molluscivores  
277 and *C. laciniatus* ( $F_{st} = -0.15$ ) (Fig 5) and higher in all other pairwise comparisons ( $F_{st} > 0.35$ )  
278 between the two specialists and two outgroup Caribbean pupfish species (S3 Table), indicating  
279 gene flow between the molluscivores on San Salvador Island and the generalist *C. laciniatus* on  
280 New Providence Island. Taking a closer look at the genetic variation in this region, we observe  
281 that the *ski* SNP fixed in the San Salvador molluscivores is homozygous in *C. laciniatus* and  
282 segregating in the generalists (Fig 6A), suggesting that it occurs at an appreciable frequency in the  
283 generalists. In the surrounding molluscivore genetic background of the fixed *ski* SNP is very  
284 similar to *C. laciniatus* (Fig 6B). In this region, there are only 62 variants between the  
285 molluscivores and *C. laciniatus* in our sample.

286 We then used TREEMIX [50] to visualize the direction gene flow in adaptively  
287 introgressed regions that contributed to species divergence in the specialists. We found evidence  
288 that genetic variation from both *C. laciniatus* and *C. bondi* introgressed into both specialists (Fig  
289 7A-D). This included the introgressed region containing *ski*, with evidence of gene flow from *C.*  
290 *laciniatus* into the molluscivore (Fig 7A). In other regions we found evidence of gene flow from  
291 both distant Caribbean Islands (New Providence Island, Bahamas and the Dominican Republic)  
292 into the generalist populations on San Salvador as well as gene flow from San Salvador into the

293 outgroup Caribbean species (S4 Table).

294

## 295 **Discussion**

### 296 **Alternative topologies reveal diverse sources of genetic variation contributed to a highly** 297 **localized adaptive radiation**

298 Our investigation of genetic variation reveals that multiple sources of genetic variation from distant  
299 corners of the Caribbean have been important in the assembly of the complex phenotypes  
300 associated with the novel ecological transitions seen only on San Salvador. While species  
301 divergence appears to mostly come from selective sweeps of standing or *de novo* genetic variation  
302 (Fig 4), rare adaptive introgression has played a role in the radiation. The adaptive introgression  
303 we found in this study has come from large admixture events into San Salvador from populations  
304 as far as 742 km across the Caribbean. Our best candidate was a region containing a single fixed  
305 variant in the molluscivore specialist previously associated with jaw size variation on San Salvador  
306 containing the proto-oncogene *ski*, adaptively introgressed from another pupfish species on an  
307 island 300 km away (Figs 5,6, and 7A, Table 1). Importantly, our limited sampling of one  
308 individual from each of two distant islands suggests that long-distance adaptive introgression is  
309 common and arises from abundant genetic variation found in only some parts of the Caribbean.

310 We rarely know the source of candidate variants involved in diversification or the  
311 contributions of multiple sources of genetic variation to rapid diversification. Genomic  
312 investigations of other adaptive radiations have also inferred roles for multiple genetic sources  
313 contributing to rapid diversification. For example, in the apple maggot fly, ancient gene flow from  
314 Mexican populations introduced an inversion affecting key diapause traits that aided the sympatric

315 host shift to apples in the United States [55]. Hybridization within Darwin's finches also appears  
316 to play a role in the origin of new lineages through adaptive introgression of functional loci  
317 contributing to beak shape differences between species [21]. In a *Mimulus* species complex,  
318 introgression of a locus affecting flower color appears to have been a driver of adaptation in the  
319 early stages of their diversification [56]. However, even in case studies demonstrating multiple  
320 sources of genetic variation, the relative contributions to the diverse ecological traits in these  
321 radiations still remain unknown in most cases (but see [57]).

322

### 323 **The genomic landscape of introgression differs between sympatric trophic specialists**

324 Only 10% of all introgressed regions in either the molluscivore or scale-eater were shared between  
325 the two. This minimal overlap may reflect the complexity of different performance demands.  
326 Performance in the two specialists involves very different sets of functional traits (i.e. higher  
327 mechanical advantage and a novel nasal protrusion in the molluscivores vs. enlarged oral jaws and  
328 adductor muscles in the scale-eaters [42]) and divergent selective regimes (narrow and shallow vs.  
329 wide and deep fitness valleys [41,58,59]). The extensive variability in the genetic variation that  
330 introgressed between the two specialists may reflect multidimensional adaptation to two distinct  
331 trophic niches in this radiation, rather than variation along a linear axis (e.g. see [60–65]).

332

### 333 **Did adaptive introgression trigger adaptive radiation?**

334 Although adaptive introgression is rare and localized across the genome, it was likely important  
335 for the assembly of the complex phenotypes observed on San Salvador (e.g. *ski*). Our findings  
336 suggest that rare adaptive introgression may have been required to trigger the radiation in the  
337 presence of ecological opportunity. Indeed, a longstanding paradox in this system is why generalist

338 populations in hypersaline lakes on neighboring islands with similar levels of ecological  
339 opportunity, lake areas, and overall genetic diversity have not radiated (Martin 2016).

340 The presence of introgressed adaptive variants on San Salvador could be explained through  
341 two main admixture scenarios. They could represent a large admixture event into the entire San  
342 Salvador genetic pool, a prediction of the hybrid swarm hypothesis [27] , which was then sorted  
343 during the initial divergence of the specialist populations. Alternatively, the introgressed adaptive  
344 variants may represent secondary gene flow, aiding the ongoing divergence of the specialists. Our  
345 TREEMIX analyses weakly support a scenario of secondary contact for several regions, including  
346 *ski*, with evidence of admixture from *C. bondi* and *C. laciniatus* directly into the specialists (Fig  
347 7). A closer investigation of the *ski* variant fixed between the specialists shows that the variant  
348 fixed in the molluscivores is segregating in the generalist population (Fig 6). This suggests that  
349 either admixture brought the adaptive *ski* allele into the generalist San Salvador population and  
350 was subsequently fixed in the molluscivores or that secondary gene flow between molluscivores  
351 and generalists has introduced the allele into the generalist through secondary contact. However,  
352 these are only exploratory inferences on directionality of gene flow and timing of introgression.  
353 They should be confirmed with demographic analyses focused on testing different scenarios of  
354 admixture into San Salvador (e.g. [26,66–70]).

355 We can roughly estimate the timing of introgression for this *ski* region from the number of  
356 variants that have accumulated between the *C. laciniatus* and molluscivore haplotypes ( $n = 62$   
357 variants; Fig 6). Assuming neutrality, the observed genetic differences between the two lineages  
358 should equal  $2\mu t$ , the time since their divergence in each lineage and  $\mu$ , the mutation rate [71].  
359 Using mutation rate estimates ranging from  $5.37 \times 10^{-7}$  (phylogeny-based estimate of *Cyprinodon*  
360 substitution rate [69]) to  $1.32 \times 10^{-7}$  mutations site<sup>-1</sup> year<sup>-1</sup> (estimated from cichlid pedigree estimate



361 of the per generation mutation rate [72] using a pupfish generation time of 6 months), introgression  
362 of the *ski* adaptive haplotype from *C. laciniatus* into the molluscivore specialist occurred between  
363 5,700 to 23,500 years ago. The 10,000 year age estimate of the San Salvador Island radiation  
364 (based on the most recent lake drying event estimates [37–39]) falls within this window, suggesting  
365 the intriguing scenario in which widespread introgression during the last glacial maximum may  
366 have triggered adaptive radiation within pupfish populations isolated in the saline lakes of San  
367 Salvador Island during their initial formation.

368         While there are rare and convincing examples of hybridization leading to homoploid  
369 speciation (reviewed in [34]), no study has yet provided convincing evidence that hybridization  
370 was directly involved in triggering an adaptive radiation. For example, while there is strong  
371 evidence in Darwin’s finches that adaptive introgression of a loci controlling beak shape has  
372 contributed to phenotypic diversity of finches in the Galapagos, this hybridization occurred  
373 between members within the radiation [21]. Another recent study argued that hybridization  
374 between ancestral lineages of the Lake Victoria superflock cichlid radiations and distant riverine  
375 cichlid lineages fueled the radiations, based on evidence of equal admixture proportions across the  
376 genomes of the Victorian radiations from the riverine lineages and the presence of allelic variation  
377 in opsins in the riverine lineages which are also important in the Victoria radiation [35]. However  
378 even this fascinating finding only indirectly supports hybridization as the trigger of adaptive  
379 radiation. Allelic variation in opsins is common in most cichlid communities [73–79] and adaptive  
380 radiation is common in many African lakes [80,81]; thus it remains unclear whether the ancestral  
381 Victorian cichlid community would not have radiated without the additional influx of opsin  
382 variation from riverine lineages. Admittedly, hybridization as the necessary and sufficient trigger  
383 of adaptive radiation is a difficult prediction to test.

384           Those examples with more direct evidence linking hybridization to adaptation and  
385 reproductive isolation within a radiation are often special cases where a single introgressed  
386 adaptive allele automatically results in increased reproductive isolation. Examples include  
387 introgressed adaptive loci controlling wing patterns in *Heliconius* butterflies involved in mimicry  
388 and mate selection [82,83], a locus controlling copper tolerance in *Mimulus* that is tightly  
389 associated with one causing hybrid lethality [12], and loci contributing to differing insecticide  
390 resistance in the M/S mosquito mating types [84–86]. While these cases provide convincing  
391 evidence that adaptive introgression can facilitate both ecological divergence and reproductive  
392 isolation, it is still unclear whether this introgression has actually triggered or simply contributed  
393 to the ongoing process of adaptive radiation.

394

#### 395 **A new small-jawed scale-eating species within the radiation?**

396 We also found evidence of a distinct clade of small-jawed scale-eaters, separate from the large-  
397 jawed scale-eaters (Figs 1 and 2). The consistent clustering of this clade across the genome  
398 suggests that they are a distinct, partially reproductively isolated population on San Salvador,  
399 rather than a product of hybridization between generalists and scale-eaters in the lakes where they  
400 exist sympatrically. Indeed, the small-jawed scale-eaters appear to be more reproductively isolated  
401 than the molluscivores and generalists, as they form a distinct clade from the other species across  
402 a larger percentage of the genome than the molluscivores do (Figs 1 and 2; S1 and S2 Figs).  
403 Instead, these small-jawed scale-eaters could represent a new ecomorph that only occurs in some  
404 lake environments. They have only been observed in the five lakes connected to the Great Lake  
405 System on San Salvador (Great Lake, Mermaid’s Pond, Osprey Pond, Oyster Pond, and Stout’s  
406 Lake), but not in isolated lakes such as Crescent Pond. Consistent with this pattern of occurrence,

407 F2 hybrid phenotypes resembling the scale-eaters have previously been shown to have extremely  
408 low survival and growth rates in these isolated lakes [58].

409 Small-jawed scale-eaters may also represent a stepping-stone in the evolutionary path to  
410 scale-eating. If they were a stepping stone, we might expect regions of the genome to reflect a  
411 nested relationship between the large-jawed and small-jawed scale-eaters. We see this predicted  
412 pattern in the combined scale-eater topology that underlies most of the fixed variants between the  
413 two specialists (Fig 2). Small-jawed scale-eater diets also appear to be consistent with intermediate  
414 levels of lepidophagy (scale-eating). Preliminary gut content analyses reveal that scales were  
415 found in the stomachs of 30% of small-jawed scale-eaters ( $n = 23$ , unpublished data J.A. McGirr)  
416 compared to 91% of large-jawed scale-eaters ( $n = 53$  [42]; CHM unpublished data).

417

418 **The complex evolutionary history of the San Salvador pupfish radiation illustrates the**  
419 **inadequacy of the “species tree” view**

420 Localized regions containing traits relevant to understanding speciation in this system would be  
421 obscured by a genome-wide species tree summary. Our dominant history contained only 10% of  
422 the variants fixed between species. Furthermore, this dominant history is not a genome-wide  
423 summary of coalescence akin to a species tree. Instead, it provides a meaningful segmentation of  
424 the genome into speciation-relevant and largely geography-relevant histories [87,88]. Speciation  
425 genomic studies of many other radiations have similarly found evidence of localized regions that  
426 are highly differentiated relative to the rest of the genome, demonstrating that specific regions play  
427 an important role in maintaining reproductive isolation in the face of gene flow [21,24,89–92].  
428 Understanding rapid adaptive radiation requires a new framework, one built upon the fact that  
429 different regions of the genome correspond to different evolutionary histories, in order to

430 understand the mechanisms that drive diversification in this system. Within this framework,  
431 species trees and other genome-wide summaries of evolutionary history are meaningless, or worse,  
432 misleading for understanding what triggers adaptive radiations (see also [89,93,94]).

433

## 434 **Conclusion**

435 Here we demonstrate that the complex phenotypes associated with the novel ecological transitions  
436 seen on San Salvador arose from multiple sources of genetic variation spread across the Caribbean.  
437 The variation important to this radiation is localized in small regions across the genome that are  
438 obscured by genome-wide summaries of the history of the radiation. Species divergence appears  
439 to mostly come from selective sweeps of standing or *de novo* genetic variation on San Salvador,  
440 but rare adaptive introgression events may also be necessary for the radiation. This genomic  
441 landscape of introgression is variable between the specialists and has come from large admixture  
442 events from populations as far as 742 km across the Caribbean. Our findings that multiple sources  
443 of genetic variation contribute to the San Salvador radiation suggests a complex suite of factors  
444 that include rare adaptive introgression, may be required to trigger adaptive radiation in the  
445 presence of ecological opportunity.

446

## 447 **Methods**

### 448 **Study system and samples**

449 Individual pupfish were caught in hypersaline lakes on San Salvador Island in the Bahamas with  
450 either a hand or seine net in 2011, 2013, and 2015. Samples were collected from seven isolated  
451 lakes on this island (Crescent Pond, Great Lake, Little Lake, Mermaid's Pond, Moon Rock Pond,  
452 Oyster Lake, and Stout's Lake) and one estuary (Pigeon Creek). 13 *Cyprinodon variegatus* were

453 sampled from all eight lakes on San Salvador Island; 10 *C. brontotheroides* were sampled from  
454 four lakes; and 14 *C. desquamator* were sampled from six lakes as the specialist species occur in  
455 sympatry with the generalists in only some of the lakes. Individual pupfish that were collected  
456 from other localities outside of San Salvador Island served as outgroups to the San Salvador Island  
457 radiation, including closely related *C. laciniatus* from Lake Cunningham, New Providence Island  
458 in the Bahamas, *C. bondi* from Etang Saumautre lake in the Dominican Republic, *C. diabolis* from  
459 Devil's Hole in California (collected as a dead specimen by National Park Staff in 2012), as well  
460 as captive-bred individuals of *C. simus* and *C. maya* originating from Laguna Chicancanab,  
461 Quintana Roo, Mexico. Fish were euthanized by an overdose of buffered MS-222 (Finquel, Inc.)  
462 following approved protocols from University of California, Davis Institutional Animal Care and  
463 Use Committee (#17455) and University of California, Berkeley Animal Care and Use Committee  
464 (AUP-2015-01-7053) and stored in 95-100% ethanol. Only degraded tissue was available for *C.*  
465 *diabolis*, as described in [69].

466

#### 467 **Genomic sequencing and bioinformatics**

468 DNA was extracted from muscle tissue using DNeasy Blood and Tissue kits (Qiagen, Inc.) and  
469 quantified on a Qubit 3.0 fluorometer (ThermoFisher Scientific, Inc.). PCR-free Truseq-type  
470 genomic libraries were prepared using the automated Apollo 324 system (WaterGen Biosystems,  
471 Inc.) at the Vincent J. Coates Genomic Sequencing Center (QB3). Samples were fragmented using  
472 Covaris sonication, barcoded with Illumina indices, and quality checked using a Fragment  
473 Analyzer (Advanced Analytical Technologies, Inc.). Nine to ten samples were pooled in four  
474 different libraries for sequencing on four lanes of Illumina 150PE Hiseq4000.

475           426 million raw reads were mapped from 42 individuals to the *Cyprinodon* reference  
476 genome (NCBI, *C. variegatus* Annotation Release 100, total sequence length = 1,035,184,475;  
477 number of scaffold = 9,259, scaffold N50, = 835,301; contig N50 = 20,803) with the Burrows-  
478 Wheeler Alignment Tool [95] (v 0.7.12). Duplicate reads were identified using MarkDuplicates  
479 and BAM indices were created using BuildBamIndex in the Picard software package  
480 ([http://picard.sourceforge.net\(v.2.0.1\)](http://picard.sourceforge.net(v.2.0.1))). We followed the best practices guide recommended in  
481 Genome Analysis Toolkit [96](v 3.5) to call and refine our SNP variant dataset using the program  
482 HaplotypeCaller. Since we lacked high-quality known variants that are typically required as a  
483 reference to filter SNP variants, we filtered SNPs based on the recommended hard filter criteria  
484 (i.e. QD < 2.0; FS < 60; MQRankSum < -12.5; ReadPosRankSum < -8) [84,96]. Our final dataset  
485 after filtering contained 16 million variants and a mean sequencing coverage of 7.2X per individual  
486 (range: 5.2–9.3X).

487

#### 488 **Characterization of genomic heterogeneity in evolutionary relationships across individuals**

489 We used the machine learning program SAGUARO [44] to identify regions of the genome that  
490 contain different signals about the evolutionary relationships across San Salvador Island and  
491 outgroup *Cyprinodon* species. Saguaro combines a hidden Markov model with a self-organizing  
492 map to characterize local phylogenetic relationships among aligned individuals without requiring  
493 *a priori* hypotheses about the relationships. This method infers local relationships among  
494 individuals in the form of genetic distance matrices and assigns segments across the genomes to  
495 these topologies. These genetic distance matrices can then be transformed into neighborhood  
496 joining trees to visualize patterns of evolutionary relatedness across the genome. Three  
497 independent runs of SAGUARO were started using the program's default settings and each was

498 allowed to assign 15 different histories across the genome. The 15<sup>th</sup> history and additional histories  
499 that we investigated tended to be uninformative about the evolutionary relationships among  
500 individuals and represented less than 0.5% of the genome. To determine how many histories to  
501 estimate, analogous to a scree plot [97,98], we plotted the proportion of the genome explained by  
502 a hypothesized history and looked for an inflection point in the section of the plot where  
503 hypothesized histories explained little of the genome. We also looked at the neighborhood joining  
504 trees to assess whether additional histories were informative about the evolutionary relationships  
505 among individuals (S9 Fig). We excluded the last history (15<sup>th</sup>) from downstream analyses due to  
506 lack of genetic distinction at both the level of populations and species included in the proposed  
507 genetic distance matrix and the low percentage of the genome assigned to it. The 14 histories  
508 included and the total percentages of the genome assigned to them were robust across all three  
509 independent runs.

510

### 511 **Characterization of introgression patterns across the genome**

512 We characterized the heterogeneity in introgression across the genome using  $f_4$  statistics that were  
513 initially developed to test for introgression among human populations [48–50]. The  $f_4$  statistic tests  
514 if branches among a four-taxon tree lack residual genotypic covariance (as expected in the presence  
515 of incomplete lineage sorting and no introgression) by comparing allele frequencies among the  
516 three possible unrooted trees. A previous study [41] provides evidence of potential admixture with  
517 the Caribbean outgroups species used in this study, preventing their use in a D-statistic framework  
518 which requires explicit outgroup designation.

519 To look for evidence of gene flow across the Caribbean, we focused on tests of  
520 introgression with the two outgroup clades from our sample that came from other Caribbean

521 islands in the Bahamas and Dominican Republic. Based on the tree ((P1, P2),(*C. laciniatus*, *C.*  
522 *bondi*)),  $f_4$  statistics were calculated for all three possible combinations of P1,P2 among the pooled  
523 populations of generalists, scale-eaters, and molluscivores on San Salvador Island. These  $f_4$   
524 statistics were calculated using the population allele frequencies of biallelic SNPs and summarized  
525 over windows of 10 kb with a minimum of 50 variant sites using a custom python script (modified  
526 from ABBABABA.py created by Simon H. Martin, available on  
527 [https://github.com/simonhmartin/genomics\\_general](https://github.com/simonhmartin/genomics_general)), allowing for up to 10% missing data within  
528 a population per site. All 10 and 14 individuals from San Salvador were used in the tests for the  
529 molluscivores and scale-eaters, respectively, for the comparison to the molluscivore and combined  
530 scale-eater histories. In another calculation of  $f_4$  statistics across the genome, the 5 small-jawed  
531 scale-eater individuals were excluded for the comparison to the large-jawed scale-eater topology.  
532 Although only single individuals from New Providence Island, Bahamas and the Dominican  
533 Republic were used to represent *C. laciniatus* and *C. bondi* in the  $f_4$  tests, these individuals that  
534 were sequenced are a random sample from the populations and should be representative. This  
535 resulted in 100,276  $f_4$  statistics (mean  $f_4 = -2 \times 10^{-4}$ ) calculated across the genome for the test that  
536 included all scale-eaters and 100,097  $f_4$  statistics (mean  $f_4 = -9 \times 10^{-5}$ ) for the test excluding the small-  
537 jawed scale-eaters. The significance of  $f_4$  values was assessed through the calculation of Z-scores  
538 using the mean and standard deviation of  $f_4$  values calculated from all regions across the genome.  
539 These Z-scores were then transformed into *P*-values and significance was assessed using a  
540 Bonferroni-corrected significance threshold of  $5 \times 10^{-7}$ .

541 It is difficult to distinguish between genetic variation that is similar among taxa due to  
542 introgression from a hybridization event and that from ancestral population structure, so some of  
543 the regions with significant  $f_4$  values may represent the biased assortment of genetic variation into



544 modern lineages from a structured ancestral population. A recent simulation study [99] found that  
545 extending the use of genome-wide introgression statistics such as Patterson's D statistic and  $f_4$   
546 statistics to small genomic regions can result in a bias of detecting statistical outliers mostly in  
547 genomic regions of reduced diversity. We assessed whether our identified regions of introgression  
548 were predominately from regions of low diversity by comparing  $D_{xy}$  and  $\pi$  estimates across the  
549 detected regions of introgression in comparison to the genome-wide estimates.

550 To visualize gene flow among the Caribbean populations included in this study, we used  
551 TREEMIX v1.12 [50] to estimate population graphs with 0-4 admixture events connecting  
552 populations. Population graphs were estimated for each region with a significant  $f_4$  value, each  
553 with a minimum of 50 SNPs and a block size of 1. The number of admixture events was estimated  
554 by comparing the rate of change in log likelihood of each additional event, an approach similar to  
555 one used in Evanno et al. ([100]; also see [41]). However, this analysis should be viewed only as  
556 an exploratory tool as the reliability of TREEMIX to detect the number of admixture events has  
557 not been tested. This analysis was designed to be applied on genome-wide allele frequencies and  
558 estimates covariance in allele frequencies among populations in branch lengths using a model that  
559 assumes allele frequency differences between populations are solely caused by genetic drift [50].  
560 The use of fewer SNPs ( $\geq 50$ ) in our window-based approach also makes it harder to reliably  
561 distinguish between the different likelihoods for the number of migration events. The reliability of  
562 inference under these conditions has not been evaluated, however the migration events inferred in  
563 our TREEMIX results were consistent with our findings from our formal  $f_4$  test for gene flow.

564

### 565 **Comparison of patterns of introgression to patterns of genetic divergence and diversity**

566 We then calculated several population genetic summary statistics in sliding windows across the

567 genome to compare to the  $f_4$  patterns of introgression:  $F_{st}$ , within-population nucleotide diversity  
568 ( $\pi$ ) for pairwise species comparisons, and Tajima's D estimates of selection in each species. These  
569 statistics were calculated in non-overlapping sliding windows of 10 kb using 'wier-fst-pop',  
570 'window-pi', and 'TajimaD' functions in VCFtools v.0.1.14 [101]. Negative values of Tajima's D  
571 indicate a reduction in nucleotide variation across segregating sites [102], which may result from  
572 hard selective sweeps due to positive selection. We took the regions with Tajima's D values in the  
573 95% percentile from the lower tail of the distribution as regions under strong positive selection.  
574 Population genetic divergence ( $D_{xy}$ ) between molluscivores and scale-eaters was calculated over  
575 the same 10-kb windows of the  $f_4$  tests using the python script popGenWindows.py created by  
576 Simon Martin (available on [https://github.com/simonhmartin/genomics\\_general](https://github.com/simonhmartin/genomics_general)). Within regions  
577 of overlap between significant  $f_4$  values, strongly negative Tajima's D values, fixed SNPs between  
578 the two specialists, and alternative topologies, we looked for annotated genes and searched their  
579 gene ontology in the phenotype database 'Phenoscape' [103–106] and AmiGO2 [107] for skeletal  
580 system effects. Skeletal features, particularly craniofacial morphologies such as jaw length, have  
581 extremely high rates of diversification among the species on San Salvador Island [36,41] and likely  
582 play a key role in the diversification of this group.

583

## 584 **Acknowledgements**

585 This study was funded by a Daphne and Ted Pengelley Award from the Center for Population  
586 Biology and the University of North Carolina to CHM. We thank J. McGirr, J. Poelstra, and the  
587 UNC EEGAS journal club for helpful discussion of this manuscript; K. Gould for performing  
588 DNA extractions; M. Grabherr for discussion of filtering strategies; members of the American

589 Killifish Association for supplying tissues, in particular A. Morales, M. Schneider, J.  
590 Cokendolpher, and A. Kodric-Brown; R. Hanna, K. Guerrero, A. Valdes Gonzalez, and L. Simons  
591 for assistance obtaining permits; the Gerace Research Centre for accommodation; the governments  
592 of the Bahamas, Dominican Republic, and the National Park Service and U.S. Fish and Wildlife  
593 Service for permission to collect pupfish samples; the Vincent J. Coates Genomic Sequencing  
594 Center and Functional Genomics Laboratory, supported by NIH S10 OD018174 Instrumentation  
595 Grant, for performing whole-genome sequencing; and the UNC ITS Research Computing Services  
596 for computational resources. We declare no competing financial interests.

597

#### 598 **Author Contributions**

599

600 EJR wrote the manuscript and conducted all analyses. CHM collected the samples and provided  
601 the genomic data. Both authors contributed to the development of ideas presented in the study and  
602 revised the manuscript.

603

#### 604 **References**

605

- 606 1. Simpson GG. Tempo and mode in evolution. Columbia University Press; 1944.
- 607 2. Schluter D. The ecology of adaptive radiation. OUP Oxford; 2000.
- 608 3. Opportunity E, Losos JB, Mahler DL. Adaptive Radiation: The Interaction of Ecological  
609 Opportunity, Adaptation, and Speciation. Evolution since Darwin: the first 150 years.  
610 Sunderland, MA: Sinauer Associates; 2010: 381–420.
- 611 4. Roderick GK, Gillespie RG. Speciation and phylogeography of Hawaiian terrestrial  
612 arthropods. Mol Ecol. 1998;7: 519–531. doi:10.1046/j.1365-294x.1998.00309.x
- 613 5. Erwin DH. Novelty and innovation in the history of life. Curr Biol. Elsevier Ltd; 2015;25:  
614 R930–R940. doi:10.1016/j.cub.2015.08.019
- 615 6. Harmon LJ, Harrison S. Species diversity is dynamic and unbounded at local and

- 616 continental scales. *Am Nat.* 2015;185: 584-593. doi:10.1086/680859
- 617 7. Burns KJ, Hackett SJ, Klein NK. Phylogenetic relationships and morphological diversity in  
618 Darwin's finches and their relatives. *Evolution.* 2002;56: 1240–1252. doi:10.1111/j.0014-  
619 3820.2002.tb01435.x
- 620 8. Thorpe RS, Surget-Groba Y, Johansson H. The relative importance of ecology and  
621 geographic isolation for speciation in anoles. *Philos Trans R Soc B.* 2008;363: 3071–81.  
622 doi:10.1098/rstb.2008.0077
- 623 9. Seehausen O and, Wagner CE. Speciation in Freshwater Fishes. *Annu Rev Ecol Evol Syst.*  
624 2014;45: 621–651. doi:10.1146/annurev-ecolsys-120213-091818
- 625 10. Abbott R, Albach D, Ansell S, Arntzen JW, Baird SJE, Bierne N, et al. Hybridization and  
626 speciation. *J Evol Biol.* 2013;26: 229–246. doi:10.1111/j.1420-9101.2012.02599.x
- 627 11. Seehausen O. Conditions when hybridization might predispose populations for adaptive  
628 radiation. *J Evol Biol.* 2013;26: 279–281. doi:10.1111/jeb.12026
- 629 12. Wright KM, Lloyd D, Lowry DB, Macnair MR, Willis JH. Indirect Evolution of Hybrid  
630 Lethality Due to Linkage with Selected Locus in *Mimulus guttatus*. *PLoS Biol.* 2013;11.  
631 doi:10.1371/journal.pbio.1001497
- 632 13. Schumer M, Cui R, Powell DL, Dresner R, Rosenthal GG, Andolfatto P. High-resolution  
633 mapping reveals hundreds of genetic incompatibilities in hybridizing fish species. *Elife.*  
634 2014;2014: 1–21. doi:10.7554/eLife.02535
- 635 14. Schumer M, Cui R, Rosenthal GG, Andolfatto P. Reproductive Isolation of Hybrid  
636 Populations Driven by Genetic Incompatibilities. *PLoS Genet.* 2015;11: 1–21.  
637 doi:10.1371/journal.pgen.1005041
- 638 15. Kirkpatrick M. Reinforcement during ecological speciation. *Proceeding R Soc London B.*  
639 2001;268: 1259–1263. doi:10.1098/rspb.2000.1426
- 640 16. Servedio MR, Noor M. The role of reinforcement in speciation: theory and data. *Annu Rev*  
641 *Ecol Evol Syst.* 2003;34: 339–364. doi:10.1146/132412
- 642 17. Matute DR. Reinforcement can overcome gene flow during speciation in *Drosophila*. *Curr*  
643 *Biol.* Elsevier Ltd; 2010;20: 2229–2233. doi:10.1016/j.cub.2010.11.036
- 644 18. Comeault AA, Matute DR. Reinforcement's incidental effects on reproductive isolation  
645 between conspecifics. *Curr Zool.* 2016;62: 135–143. doi:10.1093/cz/zow002
- 646 19. Martin SH, Dasmahapatra KK, Nadeau NJ, Slazar C, Walters JR, Simpson F, et al. Genome-  
647 wide evidence for speciation with gene flow in *Heliconius* butterflies. *Genome Res.*  
648 2013;23: 1817–1828. doi:10.1101/gr.159426.113.
- 649 20. Fontaine MC, Pease JB, Steele A, Waterhouse RM, Neafsey DE, Sharakhov I V., et al.

- 650 Extensive introgression in a malaria vector species complex revealed by phylogenomics.  
651 Science. 2015;347: 1258522–1258522. doi:10.1126/science.1258522
- 652 21. Lamichhaney S, Berglund J, Almén MS, Maqbool K, Grabherr M, Martinez-Barrio A, et  
653 al. Evolution of Darwin’s finches and their beaks revealed by genome sequencing. Nature.  
654 2015;518: 371–375. doi:10.1038/nature14181
- 655 22. Garrigan D, Kingan SB, Geneva AJ, Andolfatto P, Clark AG, Thornton KR, et al. Genome  
656 sequencing reveals complex speciation in the *Drosophila simulans* clade. Genome Res.  
657 2012;22: 1499–1511. doi:10.1101/gr.130922.111.22
- 658 23. Hedrick PW. Adaptive introgression in animals: Examples and comparison to new mutation  
659 and standing variation as sources of adaptive variation. Mol Ecol. 2013;22: 4606–4618.  
660 doi:10.1111/mec.12415
- 661 24. Malinsky M, Challis RJ, Tyers AM, Schiffels S, Terai Y, Ngatunga BP, et al. Genomic  
662 islands of speciation separate cichlid ecomorphs in an East African crater lake. Science (80-  
663 ). 2015;350: 1493–1498. doi:DOI: 10.1126/science.aac9927
- 664 25. Martin CH, Cutler JS, Friel JP, Dening Touokong C, Coop G, Wainwright PC. Complex  
665 histories of repeated gene flow in Cameroon crater lake cichlids cast doubt on one of the  
666 clearest examples of sympatric speciation. Evolution (N Y). 2015;69: 1406–1422.  
667 doi:10.1111/evo.12674
- 668 26. Kautt AF, Machado-Schiaffino G, Meyer A. Multispecies Outcomes of Sympatric  
669 Speciation after Admixture with the Source Population in Two Radiations of Nicaraguan  
670 Crater Lake Cichlids. PLoS Genet. 2016;12: 1–33. doi:10.1371/journal.pgen.1006157
- 671 27. Seehausen O. Hybridization and adaptive radiation. Trends Ecol Evol. 2004;19: 198–207.  
672 doi:10.1016/j.tree.2004.01.003
- 673 28. Berner D, Salzburger W. The genomics of organismal diversification illuminated by  
674 adaptive radiations. Trends Genet. Elsevier Ltd; 2015;31: 491–499.  
675 doi:10.1016/j.tig.2015.07.002
- 676 29. Schwarzbach AE, Rieseberg LH. Likely multiple origins of a diploid hybrid sunflower  
677 species. Mol Ecol. 2002;11: 1703–1715. doi:10.1046/j.1365-294X.2002.01557.x
- 678 30. Welch ME, Rieseberg LH. Habitat divergence between a homoploid hybrid sunflower  
679 species, *Helianthus paradoxus* (Asteraceae), and its progenitors. Am J Bot. 2002;89: 472–  
680 478. doi:10.3732/ajb.89.3.472
- 681 31. Rieseberg LH, Raymond O, Rosenthal DM, Lai Z, Livingstone K, Nakazato T, et al. Major  
682 Ecological Transitions in Wild Sunflowers Facilitated by Hybridization. Science (80- ).  
683 2003;301: 1211–1216. doi:10.1126/science.1086949
- 684 32. Gross BL, Rieseberg LH. The ecological genetics of homoploid hybrid speciation. J Hered.  
685 2005;96: 241–252. doi:10.1093/jhered/esi026

- 686 33. Whitney KD, Randell RA, Rieseberg LH. Adaptive introgression of abiotic tolerance traits  
687 in the sunflower *Helianthus annuus*. *New Phytol.* 2010;187: 230–239. doi:10.1111/j.1469-  
688 8137.2010.03234.x
- 689 34. Schumer M, Rosenthal GG, Andolfatto P. How common is homoploid hybrid speciation?  
690 *Evolution (N Y)*. 2014;68: 1553–1560. doi:10.1111/evo.12399
- 691 35. Meier JI, Marques DA, Mwaiko S, Wagner CE, Excoffier L, Seehausen O. Ancient  
692 hybridization fuels rapid cichlid fish adaptive radiations. *Nat Commun. Nature Publishing*  
693 *Group*; 2017;8: 14363. doi:10.1038/ncomms14363
- 694 36. Martin CH, Wainwright PC. Trophic novelty is linked to exceptional rates of morphological  
695 diversification in two adaptive radiations of cyprinodon pupfish. *Evolution (N Y)*. 2011;65:  
696 2197–2212. doi:10.1111/j.1558-5646.2011.01294.x
- 697 37. Hagey FM, J.E. M. Pleistocene lake and lagoon deposits, San Salvador Island, Bahamas.  
698 *Geol Soc Am.* 1995;30: 77–90.
- 699 38. Holtmeier CL. Heterochrony, maternal effects, and phenotypic variation among sympatric  
700 pupfishes. *Evolution (N Y)*. 2000;2: 330–338.
- 701 39. Turner BJ, Duvernell DD, Bunt TM, Barton MG. Reproductive isolation among endemic  
702 pupfishes (*Cyprinodon*) on San Salvador Island, Bahamas: Microsatellite evidence. *Biol J*  
703 *Linn Soc.* 2008;95: 566–582. doi:10.1111/j.1095-8312.2008.01079.x
- 704 40. Martin CH, Wainwright PC. A remarkable species flock of *Cyprinodon* pupfishes endemic  
705 to San Salvador Island, Bahamas. *Bull Peabody Museum Nat Hist.* 2013;54: 231–240.
- 706 41. Martin CH. The cryptic origins of evolutionary novelty: 1,000-fold-faster trophic  
707 diversification rates without increased ecological opportunity or hybrid swarm. *Evolution*  
708 *(N Y)*. 2016; 1–16. doi:10.1111/evo.13046
- 709 42. Martin CH, Wainwright PC. On the measurement of ecological novelty: scale-eating  
710 pupfish are separated by 168 my from other scale-eating fishes. *PLoS One.* 2013;8: e71164.  
711 doi:10.1371/journal.pone.0071164
- 712 43. McGirr JA, Martin CH. Novel candidate genes underlying extreme trophic specialization in  
713 Caribbean pupfishes. *Mol Biol Evol.* 2016; msw286. doi:10.1093/molbev/msw286
- 714 44. Zamani N, Russell P, Lantz H, Hoepfner MP, Meadows JR, Vijay N, et al. Unsupervised  
715 genome-wide recognition of local relationship patterns. *BMC Genomics.* 2013;14: 347.  
716 doi:10.1186/1471-2164-14-347
- 717 45. Martin CH, Feinstein LC. Novel trophic niches drive variable progress towards ecological  
718 speciation within an adaptive radiation of pupfishes. *Mol Ecol.* 2014;23: 1846–1862.  
719 doi:10.1111/mec.12658
- 720 46. Hubbs CL, Miller RR. Studies of the fishes of the order Cyprinodontes. XVIII. *Cyprinodon*

- 721 laciniatus, new species, from the Bahamas. Occasional Papers from Museum of Zoology  
722 University of Michigan. 1942.
- 723 47. Smith ML. *Cyprinodon nichollsi*, a new pupfish from Hispaniola, and species  
724 characteristics of *C. bondi* Myers (Teleostei: Cyprinodontiformes). *Am Museum Novit.*  
725 1989; 1–10.
- 726 48. Reich D, Thangaraj K, Patterson N, Price AL, Singh L. Reconstructing Indian population  
727 history. *Nature.* 2009;461: 489–94. doi:10.1038/nature08365
- 728 49. Patterson N, Moorjani P, Luo Y, Mallick S, Rohland N, Zhan Y, et al. Ancient Admixture  
729 in Human History. *Genetics.* 2012;192:1069-1093.
- 730 50. Pickrell JK, Pritchard JK. Inference of Population Splits and Mixtures from Genome-Wide  
731 Allele Frequency Data. *PLoS Genet.* 2012;8. doi:10.1371/journal.pgen.1002967
- 732 51. Nagase T, Mizugachi G, Nomura N, Ishizaki R, Ueno Y, Ishii S. Requirement of protein  
733 co-factor for the DNA-binding function of the human ski proto-oncogene product. *Nucleic*  
734 *Acids Res.* 1990;18: 337–343. doi:10.1093/nar/18.2.337
- 735 52. Engert JC, Servaes S, Suttrave P, Hughes SH, Rosenthal A. Activation of a muscle-specific  
736 enhancer by the ski proto-oncogene. *Nucleic Acids Res.* 1995;23: 2988–2994.  
737 doi:10.1093/nar/23.15.2988
- 738 53. Berk M, Desai SY, Heyman HC, Colmenares C. Mice lacking the ski proto-oncogene have  
739 defects in neurulation, craniofacial patterning, and skeletal muscle development. *Genes*  
740 *Dev.* 1997;11: 2029–2039. doi:10.1101/gad.11.16.2029
- 741 54. Colmenares C, Heilstedt H a, Shaffer LG, Schwartz S, Berk M, Murray JC, et al. Loss of  
742 the SKI proto-oncogene in individuals affected with 1p36 deletion syndrome is predicted  
743 by strain-dependent defects in *Ski*<sup>-/-</sup> mice. *Nat Genet.* 2002;30: 106–9. doi:10.1038/ng770
- 744 55. Feder JL, Berlocher SH, Roethele JB, Dambroski H, Smith JJ, Perry WL, et al. Allopatric  
745 genetic origins for sympatric host-plant shifts and race formation in *Rhagoletis*. *Proc Natl*  
746 *Acad Sci U S A.* 2003;100: 10314–10319. doi:10.1073/pnas.1730757100
- 747 56. Stankowski S, Streisfeld MA. Introgressive hybridization facilitates adaptive divergence in  
748 a recent radiation of monkeyflowers. *Proc R Soc London B.* 2015;282: 20151666.  
749 doi:10.1098/rspb.2015.1666
- 750 57. Pease JB, Haak DC, Hahn MW, Moyle LC. Phylogenomics Reveals Three Sources of  
751 Adaptive Variation during a Rapid Radiation. *PLoS Biol.* 2016;14: 1–24.  
752 doi:10.1371/journal.pbio.1002379
- 753 58. Martin CH, Wainwright PC. Multiple fitness peaks on the adaptive landscape drive adaptive  
754 radiation in the wild. *Science.* 2013;339: 208–11. doi:10.1126/science.1227710
- 755 59. Martin CH, Erickson PA, Miller CT. The genetic architecture of novel trophic specialists:

- 756 higher effect sizes are associated with exceptional oral jaw diversification in a pupfish  
757 adaptive radiation. *Mol Ecol.* 2017;26: 624–638. doi:10.1111/mec.13935
- 758 60. Nosil P, Harmon LJ, Seehausen O. Ecological explanations for (incomplete) speciation.  
759 *Trends Ecol Evol.* 2009;24: 145–156. doi:10.1016/j.tree.2008.10.011
- 760 61. Harmon LJ, Kolbe JJ, Cheverud JM, Losos JB. Convergence and the multidimensional  
761 niche. *Evolution (N Y).* 2005;59: 409–421. doi:10.1111/j.0014-3820.2005.tb00999.x
- 762 62. Nosil P, Harmon LJ. Niche dimensionality and ecological speciation. In: Butlin R, editor.  
763 *Speciation and Patterns of Diversity.* Cambridge: Cambridge University Press; 2009: 127–  
764 154. doi:10.1017/CBO9780511815683
- 765 63. Nosil P, Hohenlohe P. Dimensionality of sexual isolation during reinforcement and  
766 ecological speciation in. *Evol Ecol Res.* 2012;14: 467–485.
- 767 64. Doebeli M, Ispolatov I. Complexity and diversity. *Science.* 2010;328: 494–7.  
768 doi:10.1126/science.1187468
- 769 65. Ispolatov I, Doebeli M. Chaos and Unpredictability in Evolution. *Evolution (N Y).* 2013;68:  
770 1365–1373. doi:10.1111/evo.12354
- 771 66. Pinho C, Hey J. Divergence with gene flow: models and data. *Annu Rev Ecol Evol ....*  
772 2010; 215–232. doi:10.1146/annurev-ecolsys-102209-144644
- 773 67. Kautt AF, Machado-Schiaffino G, Torres-Dowdall J, Meyer A. Incipient sympatric  
774 speciation in Midas cichlid fish from the youngest and one of the smallest crater lakes in  
775 Nicaragua due to differential use of the benthic and limnetic habitats? *Ecol Evol.* 2016;6:  
776 5342–5357. doi:10.1002/ece3.2287
- 777 68. Filatov DA, Osborne OG, Papadopulos AST. Demographic history of speciation in a  
778 *Senecio* altitudinal hybrid zone on Mt. Etna. *Mol Ecol.* 2016;25: 2467–2481.  
779 doi:10.1111/mec.13618
- 780 69. Martin CH, Crawford JE, Turner BJ, Simons LH. Diabolical survival in Death Valley:  
781 recent pupfish colonization, gene flow and genetic assimilation in the smallest species range  
782 on earth. *Proc R Soc B Biol Sci.* 2016;283: 20152334. doi:10.1098/rspb.2015.2334
- 783 70. Rougemont Q, Gagnaire P-A, Perrier C, Genthon C, Besnard A-L, Launey S, et al. Inferring  
784 the demographic history underlying parallel genomic divergence among pairs of parasitic  
785 and non-parasitic lamprey ecotypes. *Mol Ecol.* 2016. doi:10.1111/mec.13664
- 786 71. Masatoshi N. Genetic distance between populations. *Am Nat.* 1972;106: 283–292.
- 787 72. Recknagel H, Elmer KR, Meyer A. A hybrid genetic linkage map of two ecologically and  
788 morphologically divergent Midas cichlid fishes (*Amphilophus* spp.) obtained by massively  
789 parallel DNA sequencing (ddRADSeq). *G3 (Bethesda).* 2013;3: 65–74.  
790 doi:10.1534/g3.112.003897



- 791 73. Schott RK, Refvik SP, Hauser FE, Lopez-Fernandez H, Chang BSW. Divergent positive  
792 selection in rhodopsin from lake and riverine cichlid fishes. *Mol Biol Evol.* 2014;31: 1149–  
793 1165. doi:10.1093/molbev/msu064
- 794 74. Spady TC, Seehausen O, Loew ER, Jordan RC, Kocher TD, Carleton KL. Adaptive  
795 molecular evolution in the opsin genes of rapidly speciating cichlid species. *Mol Biol Evol.*  
796 2005;22: 1412–1422. doi:10.1093/molbev/msi137
- 797 75. Terai Y, Seehausen O, Sasaki T, Takahashi K, Mizoiri S, Sugawara T, et al. Divergent  
798 selection on opsins drives incipient speciation in Lake Victoria cichlids. *PLoS Biol.* 2006;4:  
799 2244–2251. doi:10.1371/journal.pbio.0040433
- 800 76. Smith AR, Carleton KL. Allelic variation in Malawi cichlid opsins: A tale of two genera. *J*  
801 *Mol Evol.* 2010;70: 593–604. doi:10.1007/s00239-010-9355-x
- 802 77. O’Quin KE, Hofmann CM, Hofmann HA, Carleton KL. Parallel Evolution of opsin gene  
803 expression in African cichlid fishes. *Mol Biol Evol.* 2010;27: 2839–2854.  
804 doi:10.1093/molbev/msq171
- 805 78. Escobar-Camacho D, Ramos E, Martins C, Carleton KL. The opsin genes of amazonian  
806 cichlids. *Mol Ecol.* 2016; 301–314. doi:10.5061/dryad.1h272
- 807 79. Torres-Dowdall J, Henning F, Elmer KR, Meyer A. Ecological and lineage-specific factors  
808 drive the molecular evolution of rhodopsin in cichlid fishes. *Mol Biol Evol.* 2015;32: 2876–  
809 2882. doi:10.1093/molbev/msv159
- 810 80. Seehausen O. African cichlid fish: a model system in adaptive radiation research. *Proc R*  
811 *Soc Biol Sci.* 2006;273: 1987–98. doi:10.1098/rspb.2006.3539
- 812 81. Wagner CE, Harmon LJ, Seehausen O. Ecological opportunity and sexual selection together  
813 predict adaptive radiation. *Nature.* Nature Publishing Group; 2012;487: 366–369.  
814 doi:10.1038/nature11144
- 815 82. Jiggins CD, Naisbit RE, Coe RL, Mallet J. Reproductive isolation caused by colour pattern  
816 mimicry. *Nature.* 2001;411: 302–305. doi:10.1038/35077075
- 817 83. The Heliconius Genome Consortium, Dasmahapatra KK, Walters JR, Briscoe AD, Davey  
818 JW, Whibley A, et al. Butterfly genome reveals promiscuous exchange of mimicry  
819 adaptations among species. *Nature.* Nature Publishing Group; 2012;487: 94–98.  
820 doi:10.1038/nature11041
- 821 84. Marsden CD, Lee Y, Kreppel K, Weakley A, Cornel A, Ferguson HM, et al. Diversity,  
822 differentiation, and linkage disequilibrium: prospects for association mapping in the malaria  
823 vector *Anopheles arabiensis*. *G3 (Bethesda).* 2014;4: 121–31. doi:10.1534/g3.113.008326
- 824 85. Lee Y, Marsden CD, Norris LC, Collier TC, Main BJ, Fofana A, et al. Spatiotemporal  
825 dynamics of gene flow and hybrid fitness between the M and S forms of the malaria  
826 mosquito, *Anopheles gambiae*. *Proc Natl Acad Sci U S A.* 2013;110: 19854–9.

- 827           doi:10.1073/pnas.1316851110
- 828   86.   Norris LC, Main BJ, Lee Y, Collier TC, Fofana A, Cornel AJ, et al. Adaptive introgression  
829       in an African malaria mosquito coincident with the increased usage of insecticide-treated  
830       bed nets. *Proc Natl Acad Sci.* 2015;112: 815–820. doi:10.1073/pnas.1418892112
- 831   87.   Novikova PY, Hohmann N, Nizhynska V, Tsuchimatsu T, Ali J, Muir G, et al. Sequencing  
832       of the genus *Arabidopsis* identifies a complex history of nonbifurcating speciation and  
833       abundant trans-specific polymorphism. *Nat Genet.* Nature Publishing Group; 2016;48:  
834       1077–1082. doi:10.1038/ng.3617
- 835   88.   Garrigan D, Kingan SB, Geneva AJ, Andolfatto P, Clark AG, Thornton KR, et al. Genome  
836       sequencing reveals complex speciation in the *Drosophila simulans* clade. *Genome Res.*  
837       2012;22: 1499–1511. doi:10.1101/gr.130922.111.22
- 838   89.   Wu CI. The genic view of the process of speciation. *J Evol Biol.* 2001;14: 851–865.  
839       doi:10.1046/j.1420-9101.2001.00335.x
- 840   90.   Poelstra JW, Vijay N, Bossu CM, Lantz H, Ryll B, Müller I, et al. The genomic landscape  
841       underlying phenotypic integrity in the face of gene flow in crows. *Science* (80- ). 2014;344:  
842       1410–4. doi:10.1126/science.1253226
- 843   91.   Toews DPL, Taylor SA, Vallender R, Brelsford A, Butcher BG, Messer PW, et al. Short  
844       Article Plumage Genes and Little Else Distinguish the Genomes of Hybridizing Warblers  
845       Short Article Plumage Genes and Little Else Distinguish the Genomes of Hybridizing  
846       Warblers. *Curr Biol.* Elsevier Ltd; 2016;26: 1–6. doi:10.1016/j.cub.2016.06.034
- 847   92.   Lopes RJJ, Johnson JDD, Toomey MBB, Ferreira MSS, Araujo PMM, Melo-Ferreira J, et  
848       al. Genetic Basis for Red Coloration in Birds. *Curr Biol.* 2016;26: 1427–1434.  
849       doi:10.1016/j.cub.2016.03.076
- 850   93.   Hahn MW, Nakhleh L. Irrational exuberance for resolved species trees. *Evolution* (N Y).  
851       2016;70: 7–17. doi:10.1111/evo.12832
- 852   94.   Sukumaran J, Knowles LL. Multispecies coalescent delimits structure, not species. *Proc*  
853       *Natl Acad Sci.* 2017;114: 201607921. doi:10.1073/PNAS.1607921114
- 854   95.   Li H, Durbin R. Inference of human population history from individual whole-genome  
855       sequences. *Nature.* Nature Publishing Group; 2011;475: 493–496. doi:10.1038/nature10231
- 856   96.   DePristo MA, Banks E, Poplin R, Garimella K V, Maguire JR, Hartl C, et al. A framework  
857       for variation discovery and genotyping using next-generation DNA sequencing data. *Nat*  
858       *Genet.* 2011;43: 491–8. doi:10.1038/ng.806
- 859   97.   Cattell RB. The scree test for the number of factors. *Multivariate Behav Res.* 1966;1: 245–  
860       276.
- 861   98.   Jolliffe I. *Principal component analysis.* John Wiley & Sons, Ltd.; 2002.

- 862 99. Martin SH, Davey JW, Jiggins CD. Evaluating the use of ABBA-BABA statistics to locate  
863 introgressed loci. *Mol Biol Evol.* 2015;32: 244–257. doi:10.1093/molbev/msu269
- 864 100. Evanno G, Regnaut S, Goudet J. Detecting the number of clusters of individuals using the  
865 software STRUCTURE: A simulation study. *Mol Ecol.* 2005;14: 2611–2620.  
866 doi:10.1111/j.1365-294X.2005.02553.x
- 867 101. Danecek P, Auton A, Abecasis G, Albers CA, Banks E, DePristo MA, et al. The variant call  
868 format and VCFtools. *Bioinformatics.* 2011;27: 2156–2158.  
869 doi:10.1093/bioinformatics/btr330
- 870 102. Tajima F. Statistical method for testing the neutral mutation hypothesis by DNA  
871 polymorphism. *Genetics.* 1989;123: 585–595. doi:PMC1203831
- 872 103. Mabee P, Balhoff JP, Dahdul WM, Lapp H, Midford PE, Vision TJ, et al. 500,000 fish  
873 phenotypes: The new informatics landscape for evolutionary and developmental biology of  
874 the vertebrate skeleton. *J Appl Ichthyol.* 2012;28: 300–305. doi:10.1111/j.1439-  
875 0426.2012.01985.x
- 876 104. Midford PE, Dececchi T, Balhoff JP, Dahdul WM, Ibrahim N, Lapp H, et al. The vertebrate  
877 taxonomy ontology: a framework for reasoning across model organism and species  
878 phenotypes. *J Biomed Semantics.* 2013;4: 34. doi:10.1186/2041-1480-4-34
- 879 105. Manda P, Balhoff JP, Lapp H, Mabee P, Vision TJ. Using the phenoscape knowledgebase  
880 to relate genetic perturbations to phenotypic evolution. *Genesis.* 2015;53: 561–571.  
881 doi:10.1002/dvg.22878
- 882 106. Edmunds RC, Su B, Balhoff JP, Eames BF, Dahdul WM, Lapp H, et al. Phenoscape:  
883 Identifying candidate genes for evolutionary phenotypes. *Mol Biol Evol.* 2016;33: 13–24.  
884 doi:10.1093/molbev/msv223
- 885 107. Balsa-Canto E, Henriques D, Gabor A, Banga JR. AMIGO2, a toolbox for dynamic  
886 modeling, optimization and control in systems biology. *Bioinformatics.* 2016;32: 1–2.  
887 doi:10.1093/bioinformatics/btw411

888

889

890

891

892

893

894 **Fig. 1**

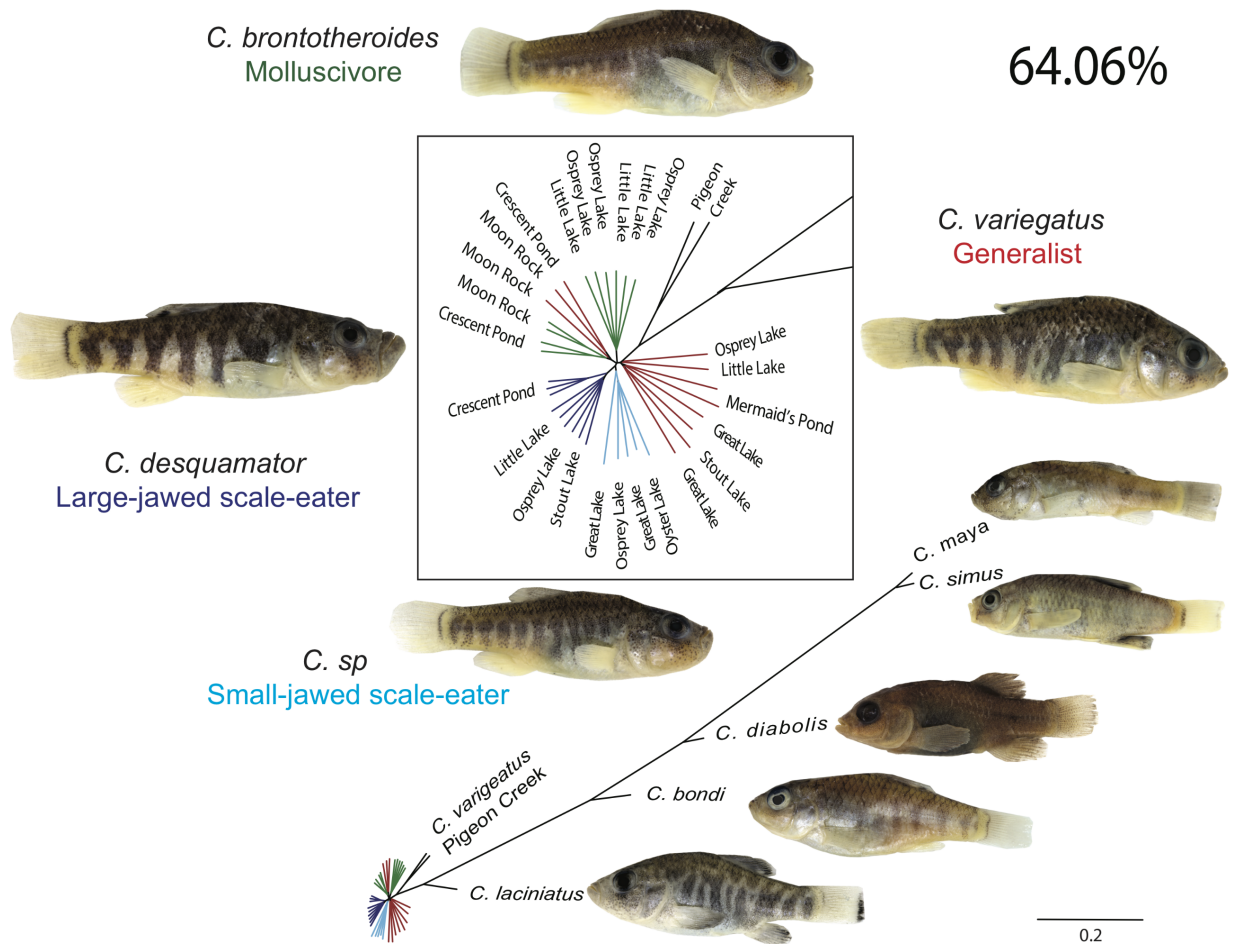

895  
896  
897 **Fig 1. Neighborhood-joining tree of the dominant history of a monophyletic San Salvador**  
898 **clade covering 64% of the genome.** San Salvador generalists (red), molluscivores (green), large-  
899 jawed scale-eaters (dark blue), small-jawed scale-eaters (light blue), and outgroup species (black)  
900 in the Caribbean, California, and Mexico. Other histories featuring a monophyletic San Salvador  
901 clade are presented in S1 Fig.

902

903

904

905

906

**Fig. 2**

**A) Large-jawed scale-eater**

**3.77%**

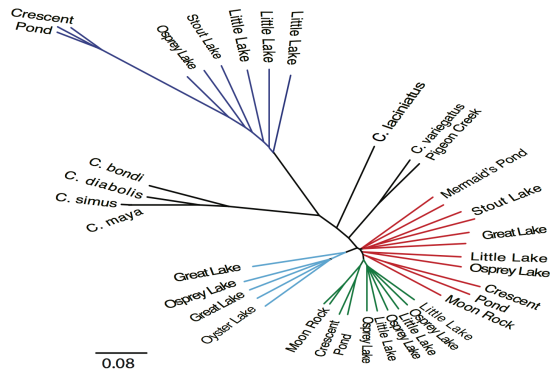

**B) Molluscivore**

**3.12%**

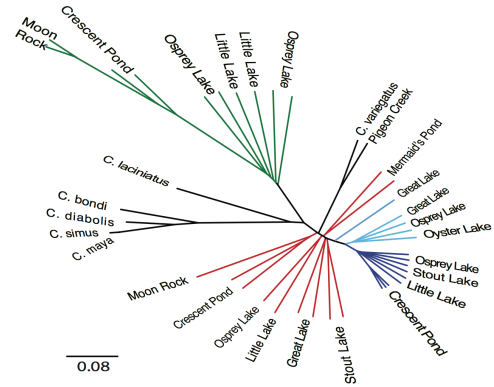

**C) Combined Scale-eater**

**1.66%**

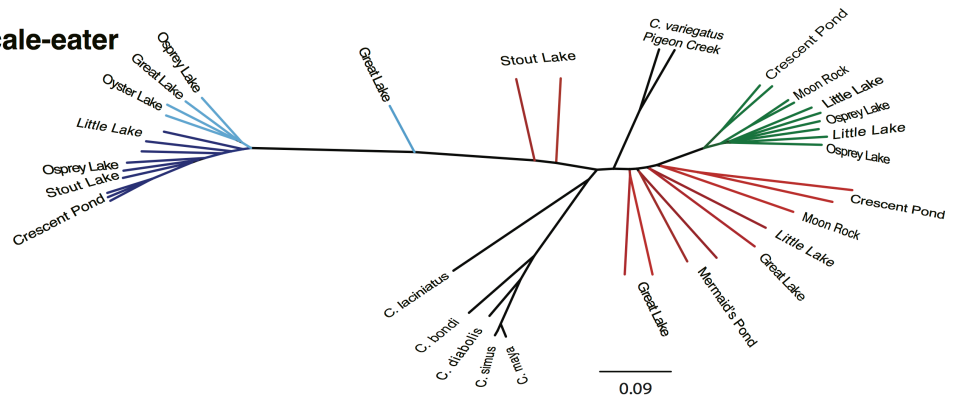

907

908 **Fig 2. Neighborhood-joining trees of alternative topologies.** (A) The large-jawed scale-eater

909 topology describing 3.77% of the genome, where larger jawed scale-eater individuals fall outside

910 of the San Salvador Island clade, with a sister relationship to outgroup pupfish species. (B) The

911 molluscivore topology assigned to a non-overlapping 3.12% of the genome, where molluscivore

912 individuals fall outside of the San Salvador Island clade, with a sister relationship to the outgroup

913 pupfish species. (C) The combined scale-eater topology assigned to another non-overlapping

914 1.66% of the genome, where all scale-eaters (along with two generalists from Stout's Lake) fall

915 outside of the San Salvador clade with a sister relationship to the outgroup pupfish species.

916 Additional alternative topologies are presented in Fig S2.

917

918 **Fig. 3**

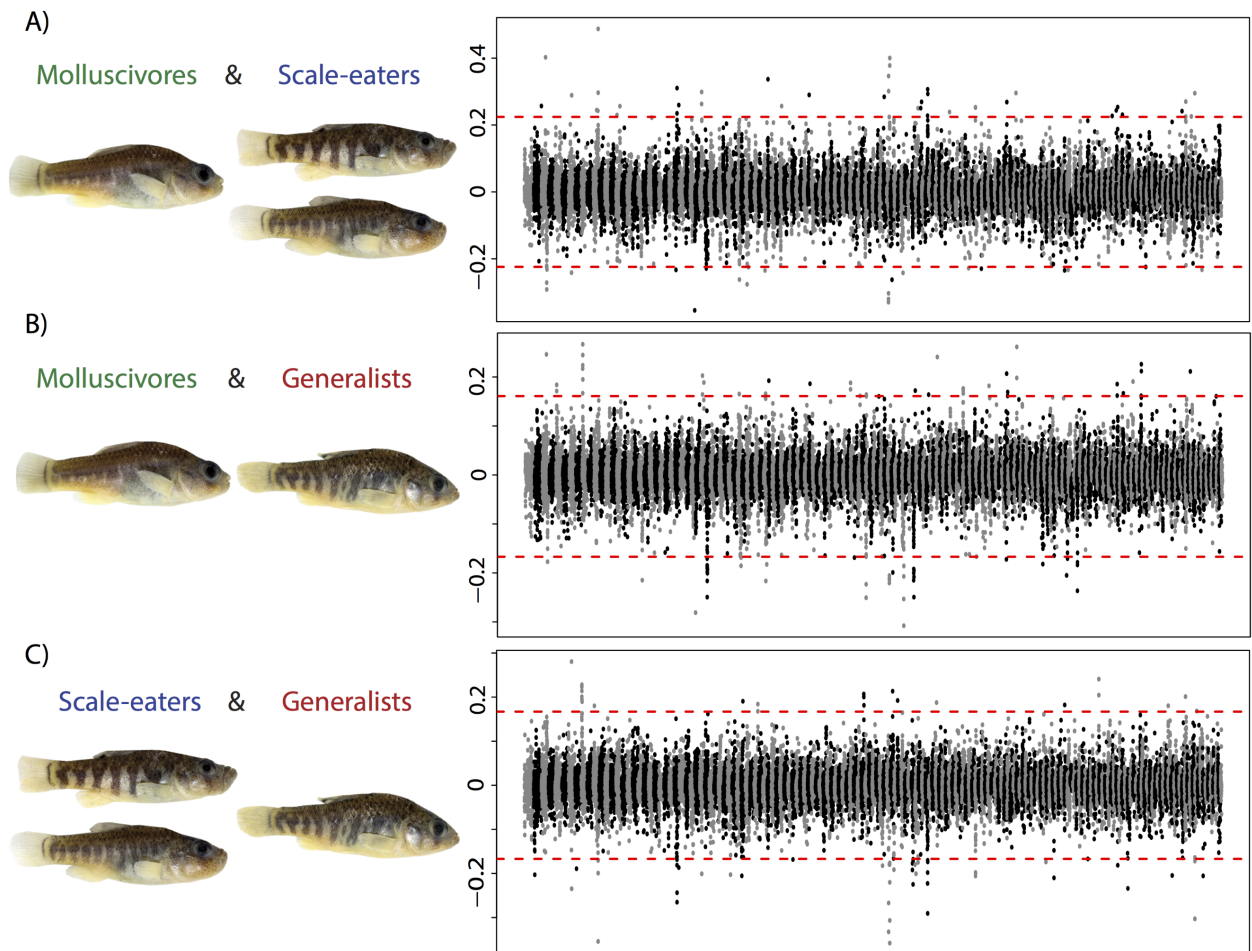

919 **Fig 3. Variable introgression from distant Caribbean islands across the genomes of the San**  
920 **Salvador trophic specialists.** Manhattan plot of the  $f_4$  values between the *C. laciniatus* from New  
921 Providence Island, Bahamas, *C. bondi* from Etang Saumautre Dominican Republic and (A)  
922 molluscivores and scale-eaters on San Salvador, (B) molluscivores and generalists from San  
923 Salvador, (C) scale-eaters and generalists on San Salvador. Alternating gray/black colors indicate  
924 different scaffolds from the largest 170 scaffolds of the genome. Dotted red lines mark the of  
925 Bonferroni-corrected significance level for the  $f_4$  values ( $P$ -value  $< 5.2 \times 10^{-7}$ ). Full Manhattan plots  
926 for each comparison are presented in Figs. S3-S6.

928

929 **Fig. 4**

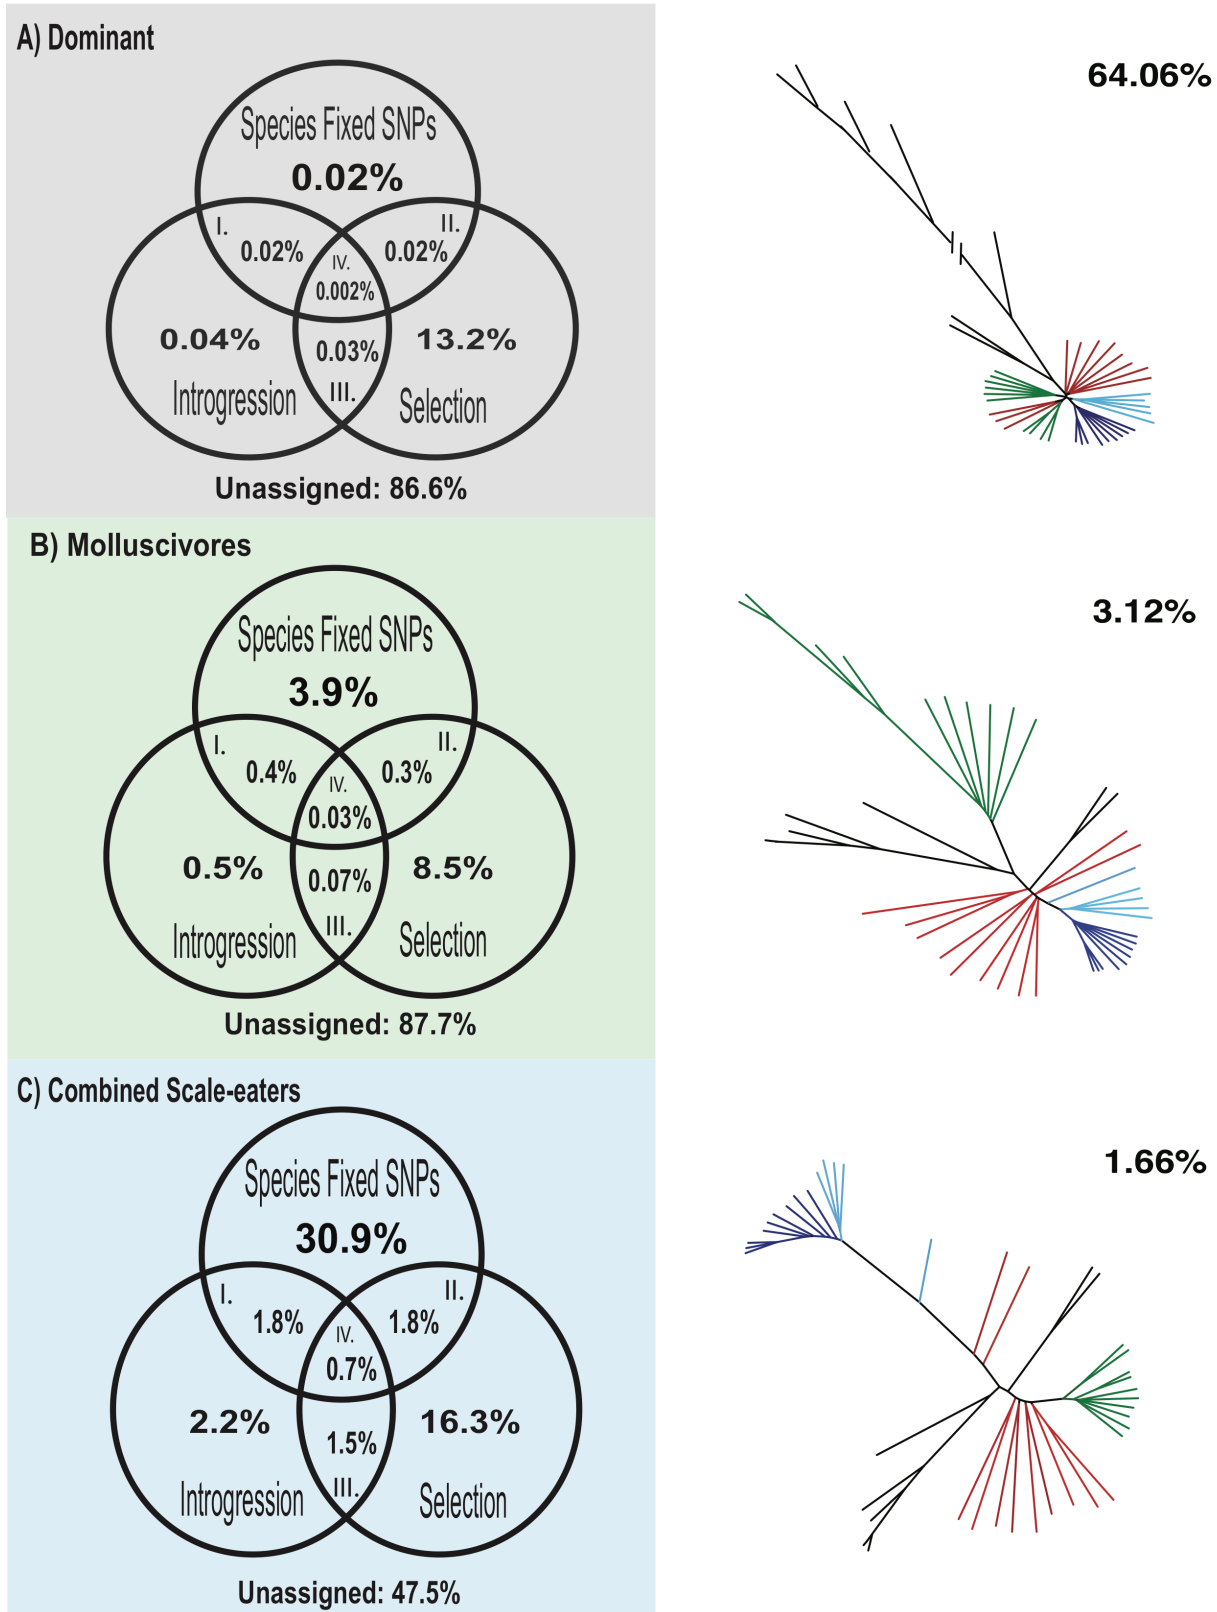

930  
931

932 **Fig 4. Contributions of selection and introgression to species divergence across regions**  
933 **assigned to different topologies.** Venn diagrams of the contribution of different sources of genetic  
934 variation to speciation in this system based on fixed SNPs between the molluscivore and combined  
935 scale-eaters, significant  $f_4$  values of introgression, hard selective sweeps (the lower 5% of the  
936 distribution of Tajima's D value) in regions assigned to the (A) dominant topology, (B)  
937 molluscivore topology, and (C) combined scale-eater topology. Under each topology, we  
938 calculated the percentage of I) regions that contain introgressed genetic variation from the  
939 Caribbean contributing to species divergence, II) regions that have undergone strong selective  
940 sweeps from non-introgressed genetic variation on San Salvador, III) adaptively introgressed  
941 regions not contributing to species divergence , and IV) regions that have undergone selective  
942 sweeps of introgressed variation that contribute to species divergence of the two specialists.

943

944

945

946

947

948

949

950

951

952

953

954



955 **Fig. 5**

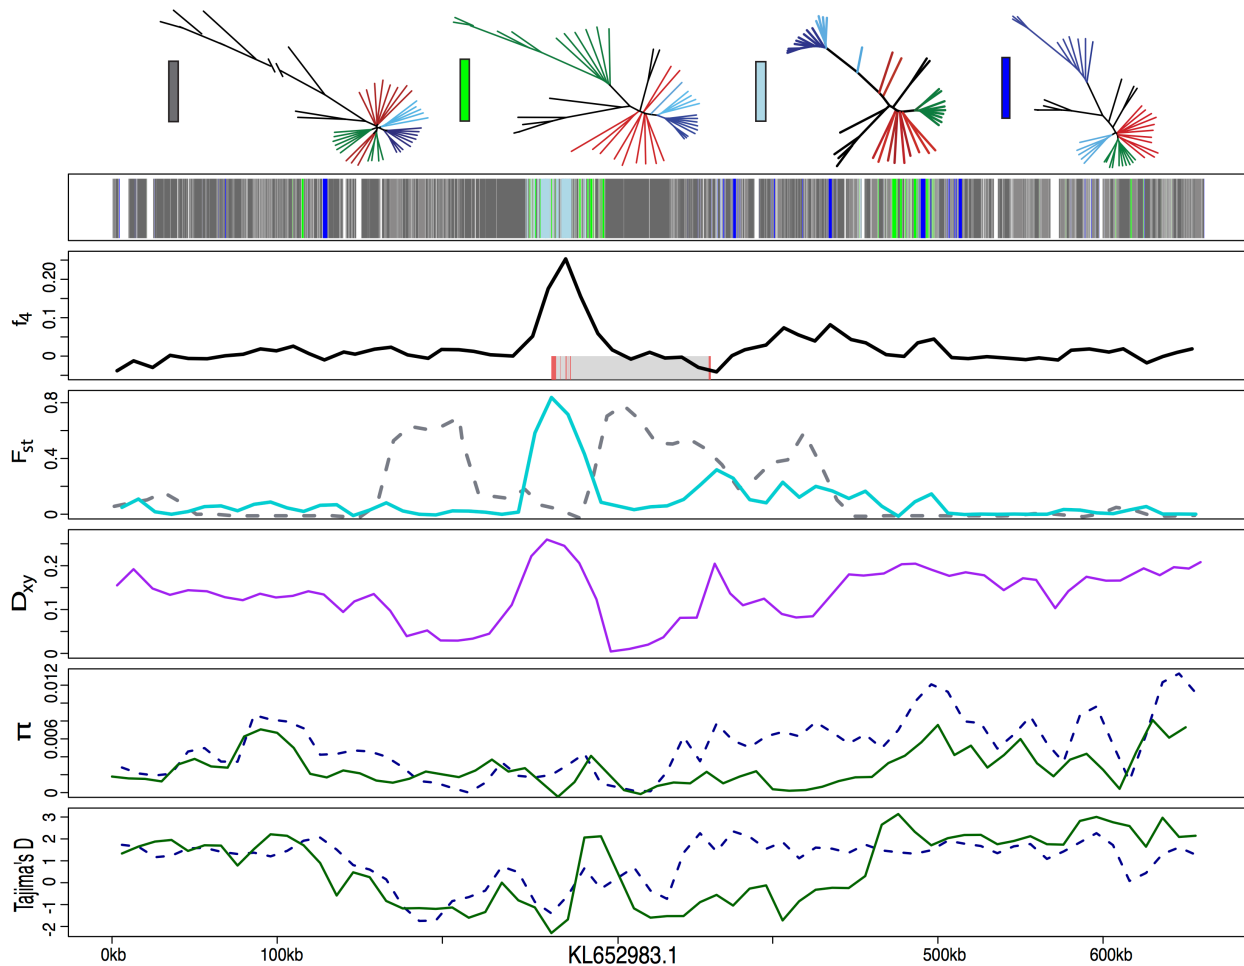

956  
957

958 **Fig 5. Candidate gene *ski* associated with jaw size [43] with signatures of introgression and**  
 959 **a hard selective sweep.** Row 1 shows the history assigned by SAGUARO to segments along a  
 960 600-kb scaffold (dark grey: dominant topology; blue: large-jawed scale-eater topology; light blue:  
 961 combined scale-eater topology; green: molluscivore topology; light grey: all other topologies;  
 962 white: unassigned segments). Row 2 shows average  $f_4$  value across non-overlapping 10-kb  
 963 windows between molluscivores/scale-eaters. Shaded grey box shows region annotated for *ski*  
 964 gene with exons in red. Row 3 shows average  $F_{st}$  value across non-overlapping 10-kb windows  
 965 between molluscivores/scale-eaters (turquoise) and molluscivores/*C. laciniatus* (gray-dashed).

966 Row 4 shows between-population divergence ( $D_{xy}$ ) across non-overlapping 10-kb windows  
967 between molluscivores/scale-eaters. Row 5 shows within-population diversity ( $\pi$ ) across non-  
968 overlapping 10-kb windows (blue-dashed: scale-eater; green: molluscivore). Row 6 shows  
969 Tajima's D across non-overlapping 10-kb windows (blue-dashed: scale-eater; green:  
970 molluscivore).

971

972

973

974

975

976

977

978

979

980

981

982

983

984

985

986

987

988

989 Fig. 6

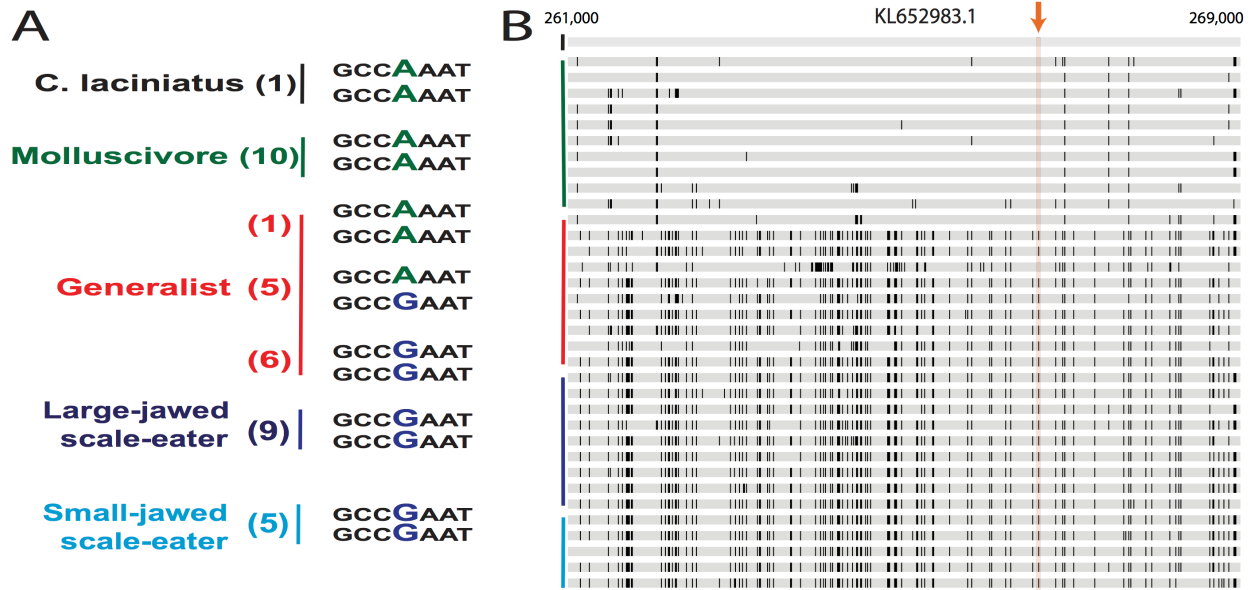

990

991 **Fig 6. Genetic diversity surrounding the fixed variant in *ski* region assigned to the combined**

992 **scale-eater topology. (A) The variant fixed between the two specialists. The number of individuals**

993 with the haplotype(s) are located in parentheses next to species names.

994 (B) A comparison of the San Salvador genotypes (green=molluscivore; red=generalists;

995 blue=scale-eater) with the *C. laciniatus* genotype (black) across an 8-kb window surrounding the

996 fixed variant (orange arrow). The alleles that do not match the alleles of *C. laciniatus* are

997 highlighted with black bars. The arrow points to the conflicting genotypes in the surrounding 8 kb

998 region of the SNP.

999

1000

1001

1002

1003

1004

1005 **Fig. 7**

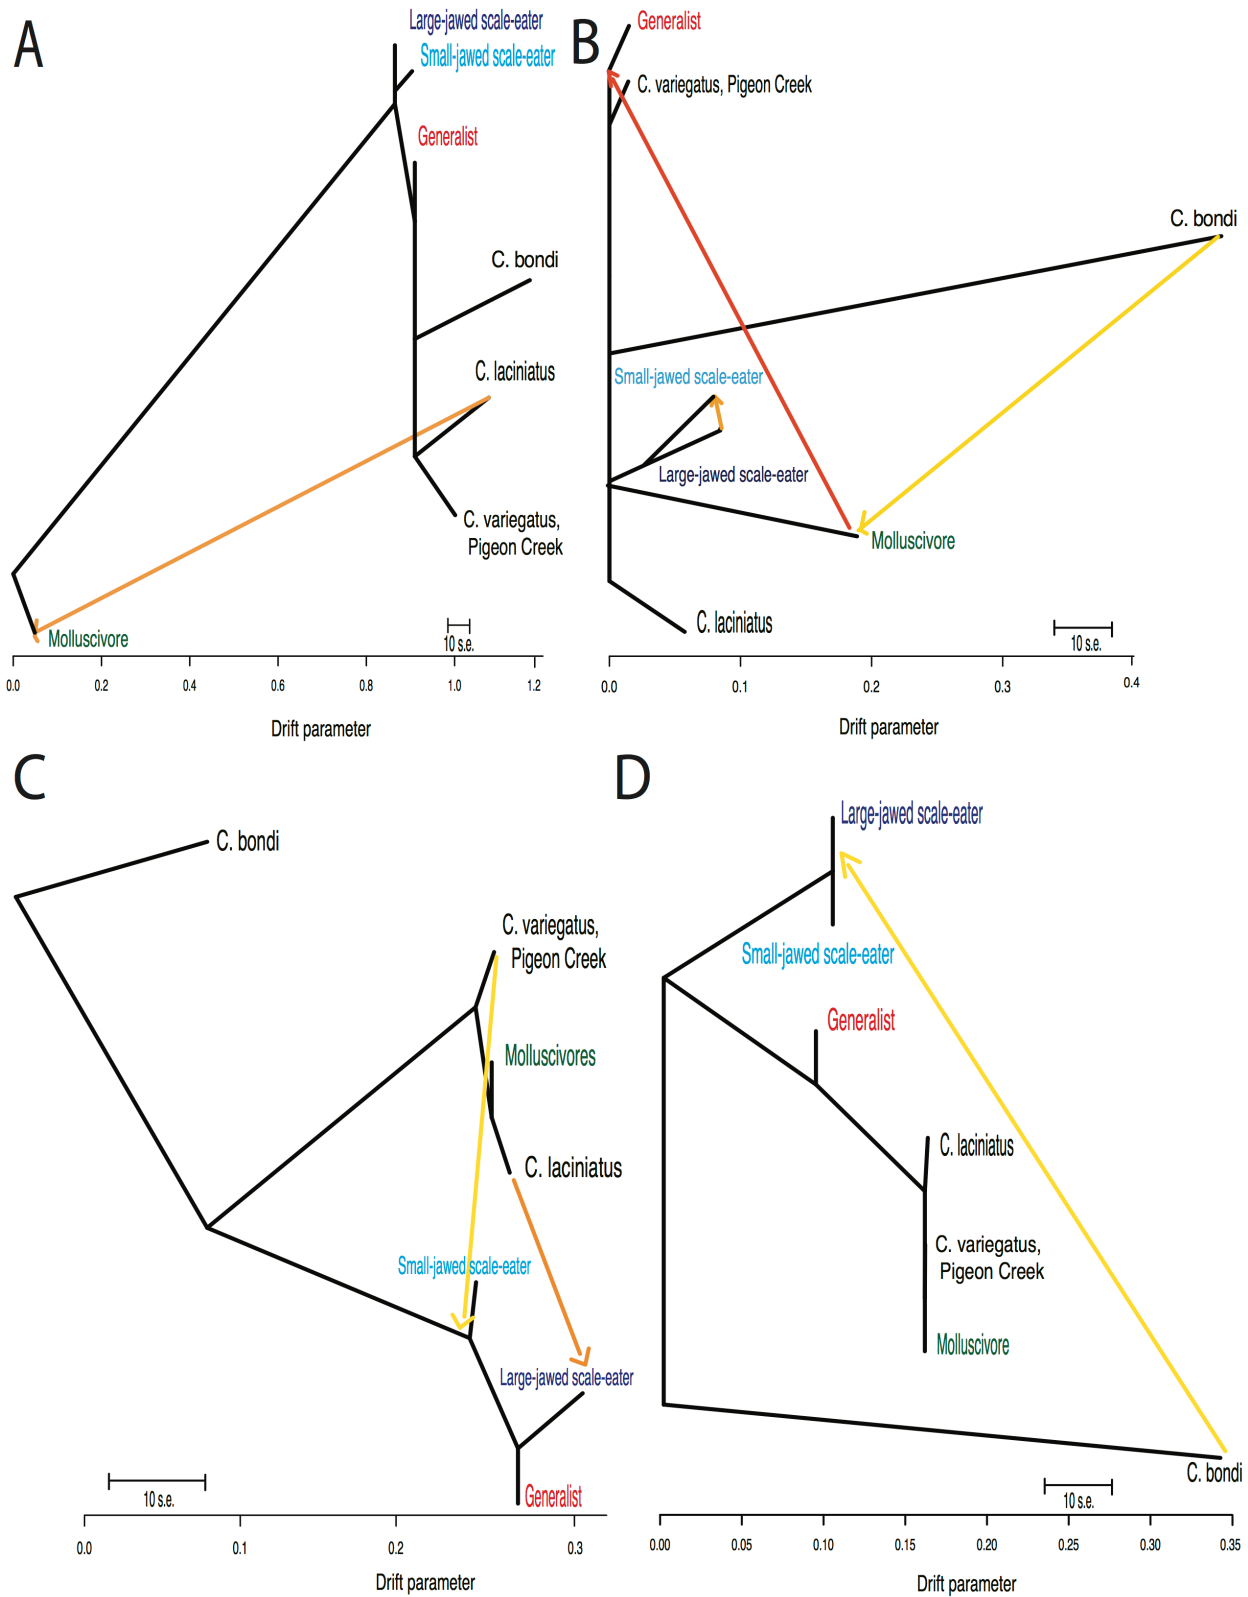

1006

1007 **Fig 7. Three different histories of adaptive introgression into the molluscivore specialist from**  
1008 **a distant Caribbean island visualized using using Treemix graphs.** Adaptively introgressed  
1009 region overlapping with the combined scale-eater topology supporting (A) gene flow from *C.*  
1010 *laciniatus* into the molluscivores in the *ski* region (change in composite log-likelihood with  
1011 increase in number of migration events:  $m=0$ , LnL: -320;  $m=1$ , LnL: 81), (B) gene flow from *C.*  
1012 *bondi* into the molluscivores ( $m=1$ , LnL: 74 ;  $m=2$  , LnL: 107), (C) gene flow from *C. laciniatus*  
1013 into the scale-eaters ( $m=0$ , LnL: -268;  $m=1$ , LnL: 95), and (D) gene flow from *C. bondi* into scale-  
1014 eaters ( $m=2$ , LnL: -274;  $m=3$ , LnL: 130).

1015

1016

1017

1018

1019

1020

1021

1022

1023

1024

1025

1026

1027

1028

1029

1030

1031

1032

1033

1034 **Supporting Information**

1035

1036 **S1 Fig. Hypothesized histories featuring a monophyletic San Salvador clade and the percent of**  
1037 **the genome assigned to the histories.** Black lineages are the *Cyprinodon* outgroups, red lineages

1038 are the San Salvador generalists, green lineages are the San Salvador molluscivores, dark blue

1039 lineages are the large jawed scale-eaters and light blue lineages are the small-jawed scale-eaters.

1040

1041 **S2 Fig. Hypothesized histories featuring a non-monophyletic San Salvador clade and the**  
1042 **percent of the genome assigned to the histories.** Black lineages are the *Cyprinodon* outgroups,

1043 red lineages are the San Salvador generalists, green lineages are the San Salvador molluscivores,

1044 dark blue lineages are the large jawed scale-eaters and light blue lineages are the small jawed

1045 scale-eater.

1046

1047 **S3 Fig. Visualization of introgression across the genomes of molluscivores and scale-eaters.**

1048 Manhattan plot of the  $f_4$  values between the San Salvador molluscivores, scale-eaters, *C.*

1049 *laciniatus* from New Providence Island, Bahamas and *C. bondi* from Etang Saumautre, Dominican

1050 Republic. Alternating gray/black colors indicate different scaffolds, starting with the largest

1051 scaffolds in the top row and the smallest scaffolds in the bottom row. Dotted red lines mark the

1052 of Bonferroni-corrected significance level for the  $f_4$  values ( $P$ -value  $< 5.2 \times 10^{-7}$ ).

1053

1054 **S4 Fig. Visualization of introgression across the genomes of molluscivores and generalists.**

1055 Manhattan plot of the  $f_4$  values between the San Salvador molluscivores, generalists, *C. laciniatus*

1056 from New Providence Island, Bahamas and *C. bondi* from Etang Saumautre, Dominican Republic.  
1057 Alternating gray/black colors indicate different scaffolds, starting with the largest scaffolds in the  
1058 top row and the smallest scaffolds in the bottom row.

1059

1060 **S5 Fig. Visualization of introgression across the genomes of scale-eaters and generalists.**

1061 Manhattan plot of the  $f_4$  values between the San Salvador large-jawed scale-eaters, small-jawed  
1062 scale-eaters, *C. laciniatus* from New Providence Island, Bahamas and *C. bondi* from Etang  
1063 Saumautre, Dominican Republic. Alternating gray/black colors indicate different scaffolds,  
1064 starting with the largest scaffolds in the top row and the smallest scaffolds in the bottom row.

1065

1066 **S6 Fig. Visualization of introgression across the genomes of large-jawed scale-eaters and**

1067 **molluscivores.** Manhattan plot of the  $f_4$  values between the San Salvador large-jawed scale-  
1068 eaters, molluscivores, *C. laciniatus* from New Providence Island, Bahamas and *C. bondi* from  
1069 Etang Saumautre, Dominican Republic. Alternating gray/black colors indicate different scaffolds,  
1070 starting with the largest scaffolds in the top row and the smallest scaffolds in the bottom row.

1071

1072 **S7 Fig. Comparison of  $f_4$  to genetic diversity statistics over 10-kb non-overlapping windows.** Red

1073 dots indicate 10-kb regions with signals of introgression above Bonferroni-corrected significance  
1074 level the  $f_4$  values ( $P$ -value  $< 5.2 \times 10^{-7}$ ). The  $f_4$  statistic of a region compared to A)  $F_{st}$  between  
1075 molluscivores and scale-eaters in the region, B)  $D_{xy}$  between molluscivores and scale-eaters on  
1076 San Salvador, C) within-population diversity in molluscivores, and D) within-population diversity  
1077 in San Salvador scale-eaters.

1078

1079 **S8 Fig. The percentage of segments assigned to large-jawed scale-eater topology that contain**  
1080 **signatures of species divergence, selection, and introgression.** Venn diagrams of the  
1081 contribution of different sources of genetic variation to speciation in this system based on the  
1082 overlap of regions with fixed SNPs between the molluscivore and large-jawed scale-eater,  
1083 significant  $f_4$  values of introgression, the lower 5% of the distribution of Tajima's D value with  
1084 positive selection and their overlap. Under each topology, we calculated the percentage of I)  
1085 regions that contain introgressed genetic variation from the Caribbean contributing to species  
1086 divergence, II) regions that have undergone strong selective sweeps from non-introgressed  
1087 genetic variation on San Salvador, III) adaptively introgressed regions not contributing to species  
1088 divergence, and IV) regions that have undergone selective sweeps of introgressed variation that  
1089 contribute to species divergence of the two specialists.

1090

1091 **S9 Fig. The proportion of the genome assigned to each topology by SAGRUARO.** The insert is a  
1092 closer look at the 13 topologies assigned to the smallest proportion of the genome and the  
1093 uninformative 15<sup>th</sup> topology hypothesized. This shows a saturation in the variation in topologies  
1094 across the genome at 14.

1095

1096 **S1 Table: Hypothesized topologies from the SAGUARO analysis.**

1097

1098 **S2 Table: Summary statistics in adaptively introgressed regions.**

1099



1100 **S3 Table: Pairwise genetic divergence ( $F_{st}$ ) between molluscivores, scale-eaters, *C. laciniatus***  
1101 **and *C. bondi*.**

1102

1103 **S4 Table: Summary of admixture events inferred by TREEMIX for the 21 adaptively**  
1104 **introgressed regions assigned to the three alternative topologies.** San Salvador Island generalist  
1105 (G), San Salvador Island large-jawed scale-eater (L), San Salvador Island small-jawed scale-eater  
1106 (S), San Salvador Island molluscivore (M), *C. laciniatus* from New Providence Island Bahamas  
1107 (CUN), *C. bondi* from Dominican Republic (ETA), most recent common ancestor of Caribbean  
1108 pupfish lineages (MRC).
